# Supplementary material for: Plasticity-induced actin polymerization in the dendritic shaft regulates intracellular AMPA receptor trafficking
Source: eLife. 2024 Aug 15;13:e80622. doi: 10.7554/eLife.80622 (PMC11326776; doi:10.7554/eLife.80622)
Supplement: Figure 1—figure supplement 1—source data 1. [file elife-80622-fig1-figsupp1-data1.xlsx]

## Sheet: Figure 1-figure supplement 1
Figure 1-figure supplement 1-source data 1 - related to Figure 1-figure supplement 1B - HaloTag+ neurons for different Cas9/gRNA target sequences and linker lengths
		HaloTag+ (Count)
		0AA linker			5AA linker			10AA linker
	Experiment	1	2	3	1	2	3	1	2	3
Insertion position	5	0	1	0	1	1	4	2	1	3
	6	0	1	0	2	1	1	1	0	0
	26	0	1	0	1	1	1	1	2	1
	280	3	2	4	88	66	63	45	36	50
	396	1	4	1	60	51	75	35	60	37
Figure 1-figure supplement 1-source data 2 - related to Figure 1-figure supplement 1C - GluA1-HT-JF549 labeling and knock-in efficiencies
	HaloTag+ (Count)						Relative frequency (%)
Experiment	1	2	3	4	5	6	1	2	3	4	5	6
Transfection (Txn)	138	116	113	155	147	142	1.73	1.45	1.41	1.94	1.84	1.78
AAV - SL1	175	180	191	137	117	148	2.19	2.25	2.39	1.71	1.46	1.85
AAV - rh10	205	212	196	170	229	215	2.56	2.65	2.45	2.13	2.86	2.69
