# Supplementary material for: Plasticity-induced actin polymerization in the dendritic shaft regulates intracellular AMPA receptor trafficking
Source: eLife. 2024 Aug 15;13:e80622. doi: 10.7554/eLife.80622 (PMC11326776; doi:10.7554/eLife.80622)
Supplement: Figure 1—figure supplement 2—source data 1. [file elife-80622-fig1-figsupp2-data1.xlsx]

## Sheet: Figure 1-figure supplement 2
Figure 1-figure supplement 2-source data 1- related to Figure 1-figure supplement 2B - HCR RNA-FISH - Gria1 mRNA vs HaloTag mRNA per cell
	Average mRNA per cell
Experiment	Gria1 (WT)	Gria1 (Transfected)	HT (Transfected)
1	225.79	260.67	181.3
2	266.76	234.3	183.62
3	294.26	268.59	155.77
	Fraction of cells
	0 ATS			1 ATS			2 ATS
	Average	SD	Experiments	Average	SD	Experiments	Average	SD	Experiments
Gria1 (WT)	0.0288832	0.0105423	3	0.113039	0.0588999	3	0.858078	0.0592091	3
Gria1 (Transfected)	0.04	0.01	3	0.17	0.04	3	0.79	0.05	3
HT (Transfected)	0.1	0.06	3	0.56	0.06	3	0.34	0.01	3
	Average mRNA per cell
	Gria1 (Transfected)			HT (Transfected)
Experiment	1	2	3	1	2	3
0 ATS	126	182.33	79.5	84.67	67.2	39
1 ATS	158.55	142.8	142.78	157.55	111.6	142.36
2 ATS	262.68	298.27	292.57	267	266.3	283.14
Figure 1-figure supplement 2-source data 2- related to Figure 1-figure supplement 2C - Two-color HCR RNA-FISH for HaloTag mRNA and Gria1 mRNA
	Fraction with correlated localization
Cell	HT	G1
1	0.76	0.71
2	0.77	0.75
3	0.84	0.83
4	0.89	0.89
5	0.81	0.75
6	0.9	0.86
7	0.83	0.83
