# Supplementary material for: Plasticity-induced actin polymerization in the dendritic shaft regulates intracellular AMPA receptor trafficking
Source: eLife. 2024 Aug 15;13:e80622. doi: 10.7554/eLife.80622 (PMC11326776; doi:10.7554/eLife.80622)
Supplement: Figure 1—figure supplement 3—source data 1. [file elife-80622-fig1-figsupp3-data1.xlsx]

## Sheet: Figure 1-figure supplement 3
Figure 1-figure supplement 3-source data 1- related to Figure 1-figure supplement 3A - colocalization between GluA1-HT and GluA1 in knock-in neurons
	Coefficient - GluA1 vs GluA1-HT
Cell	PCC	MC1	MC2
1	0.91	0.81	0.72
2	0.73	0.75	0.75
3	0.7	0.88	0.84
4	0.81	0.84	0.8
5	0.85	0.93	0.86
6	0.83	0.92	0.89
7	0.65	0.73	0.76
8	0.8	0.91	0.93
9	0.7	0.67	0.65
Figure 1-figure supplement 3-source data 2- related to Figure 1-figure supplement 3C - distance between GluA1/GluA1-HT puncta and PSD protein puncta
	GluA1			GluA1-HT
	Average distance (μm)	Std Dev	Pairs of puncta	Average distance (μm)	Std Dev	Pairs of puncta
Homer1c	0.15	0.05	76	0.138	0.044	65
PSD95	0.121	0.03	55	0.135	0.035	57
GluN1	0.154	0.069	165	0.147	0.052	106
Figure 1-figure supplement 3-source data 3- related to Figure 1-figure supplement 3D - fraction of spines with a PSD marker alone, GluA1/GluA1-HT alone, or both a PSD marker and GluA1/GluA1-HT
		Fraction of spines
		PSD marker only	GluA1/GluA1-HT only	PSD and GluA1/GluA1-HT
Homer1c	GluA1-HT	0.17	0.04	0.79
	GluA1	0.1	0.08	0.83
PSD95	GluA1-HT	0.07	0.05	0.88
	GluA1	0.08	0.05	0.87
GluN1	GluA1-HT	0.16	0.01	0.83
	GluA1	0.15	0	0.85
