# Supplementary material for: Plasticity-induced actin polymerization in the dendritic shaft regulates intracellular AMPA receptor trafficking
Source: eLife. 2024 Aug 15;13:e80622. doi: 10.7554/eLife.80622 (PMC11326776; doi:10.7554/eLife.80622)
Supplement: Figure 1—figure supplement 4—source data 1. [file elife-80622-fig1-figsupp4-data1.xlsx]

## Sheet: Figure 1-figure supplement 4
Figure 1 - figure supplement 4-source data 1 - related to Figure 1-figure supplement 4A - peak current density (pA/pF) in HEK293T cells expressing GluA1 versus GluA1-HT
	Peak current density (pA/pF)
Cell	GluA1	GluA1-HT	No Transfection
1	-14.226	-23.791	-0.818
2	-9.863	-11.369	-0.699
3	-22.665	-32.409	-1.019
4	-9.786	-12.139	-0.597
5	-14.398	-21.212	-0.55
6	-68.574	-18.4	-0.653
7	-29.864	-7.468	-0.97
8	-6.01	-13.339	-0.728
9	-10.329	-37.188	-1.666
10	-7.651	-9.63	-0.807
11	-5.875	-22.321	-1.077
12	-7.819	-13.754	-0.959
13	-11.859		-0.747
Figure 1 - figure supplement 4-source data 2 - related to Figure 1-figure supplement 4B - peak current density (pA/pF) in unlabeled versus GluA1-HT neurons
	Peak current density (pA/pF)
Cell	WT	GluA1-HT
1	-16.335	-12.705
2	-6.038	-5.173
3	-7.554	-15.108
4	-6.243	-5.781
5	-11.066	-13.062
6	-9.404	-21.688
7	-14.059	-11.322
8	-9.862	-25.449
9	-8.847	-26.658
10	-11.942
11	-6.76
12	-4.338
13	-5.748
