# Supplementary material for: Plasticity-induced actin polymerization in the dendritic shaft regulates intracellular AMPA receptor trafficking
Source: eLife. 2024 Aug 15;13:e80622. doi: 10.7554/eLife.80622 (PMC11326776; doi:10.7554/eLife.80622)
Supplement: Figure 1—figure supplement 5—source data 1. [file elife-80622-fig1-figsupp5-data1.xlsx]

## Sheet: Figure 1-figure supplement 5
Figure 1-figure supplement 5-source data 1 - related to Figure 1-figure supplement 5E - diffusion coefficients (D, μm2/s) of GluA1-HT particles determined by HMM-Bayes vs by MSD fitting																Figure 1-figure supplement 5-source data 2 - related to Figure 1-figure supplement 5F - average diffusion coefficients (D, μm2/s) for GluA1-HT particles from different dissections																		Figure 1-figure supplement 5-source data 5 - related to Figure 1-figure supplement 5H (histogram, right) - GluA1-HT particle diffusion coefficients (D) after nocodazole treatment
Trajectory	HMM	Fitting															Dissection																	Trajectory	No Treatment	Nocodazole
1	0.4315	0.3566															1			2			3			4			5					1	0.9745	0.8725
2	0.3766	0.2966														Experiment	1	2	3	1	2	3	1	2	3	1	2	3	1	2				2	0.8817	0.7572
3	0.3634	0.4164														Control	0.12	0.13	0.09	0.15	0.11	0.1	0.11	0.11	0.09	0.11	0.12	0.15						3	0.8082	0.7212
4	0.3505	0.2655														cLTP	0.08	0.07	0.09	0.06	0.08	0.08	0.07	0.06	0.06	0.06	0.07	0.07	0.06	0.06				4	0.7623	0.647
5	0.3442	0.3146																																5	0.7442	0.6349
6	0.3411	0.3206														Figure 1-figure supplement 5-source data 3 - related to Figure 1-figure supplement 5G - fraction of GluA1-HT particles exhibiting active transport from different dissections																		6	0.7185	0.5633
7	0.3404	0.4467															Dissection																	7	0.6948	0.5512
8	0.3131	0.3469															1			2			3			4			5					8	0.6231	0.5035
9	0.3121	0.3237														Experiment	1	2	3	1	2	3	1	2	3	1	2	3	1	2				9	0.5934	0.483
10	0.302	0.2282														Control	0.48	0.26	0.46	0.27	0.42	0.4	0.27	0.38	0.36	0.3	0.46	0.38						10	0.5455	0.4711
11	0.2965	0.2921														cLTP	0.16	0.19	0.08	0.13	0.11	0.11	0.13	0.09	0.07	0.07	0.19	0.19	0.08	0.07				11	0.5036	0.4619
12	0.2925	0.3609																																12	0.4976	0.4314
13	0.2915	0.1971																																13	0.4824	0.4044
14	0.2815	0.277														Figure 1-figure supplement 5-source data 4 - related to Figure 1-figure supplement 5H (bar graph, left) - fraction of GluA1-HT particles exhibiting active transport after nocodazole treatment																		14	0.4708	0.387
15	0.2696	0.244															Active Transport																	15	0.457	0.377
16	0.2687	0.2608														Dendrite (Neuron)	Control	Nocodazole																16	0.4355	0.3557
17	0.2566	0.2615														1	0.3	0																17	0.4169	0.3513
18	0.2457	0.2459														2	0.2	0																18	0.3871	0.3383
19	0.2416	0.2453														3	0.2	0																19	0.3824	0.33
20	0.241	0.2751														4	0.36	0.1																20	0.3794	0.3259
21	0.2341	0.3093														5	0.29	0.05																21	0.3515	0.3258
22	0.2196	0.2148														6	0.28	0.07																22	0.3423	0.3146
23	0.2184	0.2183														7	0.16	0.05																23	0.336	0.3137
24	0.2134	0.2002														8	0.25	0																24	0.3273	0.3003
25	0.2065	0.2499														9	0.29																	25	0.0749	0.2984
26	0.195	0.2091														10	0.22																	26	0.3184	0.2888
27	0.1918	0.1918																																27	0.3037	0.2764
28	0.1895	0.1775																																28	0.2911	0.268
29	0.1892	0.2034																																29	0.2861	0.2677
30	0.1872	0.1929																																30	0.2766	0.2624
31	0.187	0.0715																																31	0.276	0.2618
32	0.1838	0.1836																																32	0.269	0.2572
33	0.1837	0.1894																																33	0.2668	0.256
34	0.1826	0.2431																																34	0.2661	0.255
35	0.1829	0.1692																																35	0.2571	0.2446
36	0.1813	0.0909																																36	0.2569	0.2409
37	0.1747	0.1987																																37	0.2563	0.2378
38	0.1744	0.159																																38	0.254	0.2351
39	0.1737	0.1974																																39	0.2538	0.2344
40	0.1681	0.2305																																40	0.2486	0.2309
41	0.1654	0.0564																																41	0.2454	0.2221
42	0.161	0.2029																																42	0.2447	0.2185
43	0.1578	0.1747																																43	0.2439	0.2157
44	0.1556	0.1926																																44	0.2405	0.196
45	0.1549	0.0896																																45	0.2374	0.1955
46	0.1539	0.1683																																46	0.2374	0.1846
47	0.1527	0.1321																																47	0.2338	0.1823
48	0.1524	0.1634																																48	0.2336	0.1798
49	0.1518	0.1401																																49	0.2293	0.1786
50	0.1515	0.2107																																50	0.2277	0.1764
51	0.1513	0.13																																51	0.2258	0.1749
52	0.1488	0.1779																																52	0.2236	0.1743
53	0.1463	0.2141																																53	0.2223	0.1728
54	0.1457	0.1634																																54	0.2202	0.1702
55	0.1453	0.1419																																55	0.2184	0.1672
56	0.1448	0.1434																																56	0.2148	0.1634
57	0.1438	0.1398																																57	0.2141	0.1574
58	0.1432	0.0835																																58	0.2135	0.1547
59	0.1423	0.1508																																59	0.2131	0.1525
60	0.1415	0.1749																																60	0.2056	0.1497
61	0.1407	0.157																																61	0.2019	0.1474
62	0.1398	0.1431																																62	0.2016	0.1427
63	0.138	0.1454																																63	0.1996	0.1423
64	0.1361	0.148																																64	0.1991	0.1388
65	0.1359	0.0582																																65	0.1953	0.1369
66	0.1355	0.1392																																66	0.1952	0.1368
67	0.135	0.1365																																67	0.1861	0.1286
68	0.1323	0.1353																																68	0.1861	0.1285
69	0.132	0.1389																																69	0.1816	0.1276
70	0.1317	0.1828																																70	0.1816	0.1233
71	0.1314	0.1477																																71	0.1759	0.1222
72	0.1309	0.1519																																72	0.1741	0.1203
73	0.1303	0.136																																73	0.1702	0.1195
74	0.1298	0.1497																																74	0.1675	0.1163
75	0.1295	0.0767																																75	0.158	0.1142
76	0.1292	0.1194																																76	0.157	0.1127
77	0.129	0.0994																																77	0.1507	0.1094
78	0.1236	0.1404																																78	0.1501	0.1093
79	0.1234	0.0756																																79	0.1462	0.1069
80	0.1233	0.165																																80	0.1443	0.1062
81	0.1216	0.0429																																81	0.1424	0.1057
82	0.1213	0.0525																																82	0.1414	0.1
83	0.1213	0.083																																83	0.1389	0.0999
84	0.1209	0.0617																																84	0.1387	0.0978
85	0.1201	0.145																																85	0.138	0.0973
86	0.1197	0.0999																																86	0.1341	0.0948
87	0.1194	0.074																																87	0.134	0.0911
88	0.118	0.1186																																88	0.1328	0.0909
89	0.117	0.1138																																89	0.1323	0.0903
90	0.1168	0.1294																																90	0.1283	0.0899
91	0.1157	0.0731																																91	0.1271	0.0863
92	0.1157	0.1127																																92	0.1248	0.0844
93	0.1148	0.1333																																93	0.1221	0.0843
94	0.1138	0.1028																																94	0.1216	0.0821
95	0.1134	0.0731																																95	0.1207	0.0731
96	0.1132	0.0982																																96	0.1203	0.0707
97	0.1125	0.0706																																97	0.1199	0.0703
98	0.1106	0.132																																98	0.1194	0.0658
99	0.11	0.1477																																99	0.1179	0.0658
100	0.1097	0.0335																																100	0.1179	0.0652
101	0.1095	0.1463																																101	0.1167	0.0624
102	0.1085	0.1111																																102	0.1161	0.0615
103	0.1082	0.1047																																103	0.1118	0.061
104	0.1082	0.071																																104	0.1118	0.0584
105	0.1081	0.0798																																105	0.111	0.058
106	0.1074	0.1229																																106	0.1108	0.0573
107	0.1071	0.0792																																107	0.1088	0.0551
108	0.1047	0.2094																																108	0.1085	0.0531
109	0.1048	0.1016																																109	0.1074	0.0527
110	0.1026	0.1247																																110	0.1034	0.0519
111	0.102	0.0805																																111	0.1033	0.0508
112	0.102	0.0794																																112	0.1024	0.0472
113	0.0995	0.108																																113	0.1008	0.0472
114	0.0972	0.1476																																114	0.097	0.0464
115	0.0951	0.1038																																115	0.097	0.0446
116	0.095	0.0991																																116	0.0949	0.0434
117	0.0943	0.0972																																117	0.0941	0.041
118	0.0935	0.1526																																118	0.0923	0.04
119	0.0935	0.0759																																119	0.091	0.0398
120	0.0926	0.0946																																120	0.0892	0.0394
121	0.0915	0.1166																																121	0.0833	0.0371
122	0.0914	0.1115																																122	0.0827	0.0362
123	0.0908	0.1237																																123	0.081	0.0343
124	0.0903	0.1277																																124	0.0808	0.0341
125	0.0902	0.0724																																125	0.079	0.0339
126	0.0895	0.0654																																126	0.0785	0.0319
127	0.0893	0.0485																																127	0.0785	0.0307
128	0.0892	0.0873																																128	0.0784	0.0304
129	0.0886	0.0873																																129	0.0777	0.0276
130	0.088	0.0684																																130	0.0776	0.027
131	0.0861	0.1007																																131	0.0755	0.026
132	0.0857	0.0863																																132	0.0747	0.022
133	0.084	0.0862																																133	0.0747	0.0217
134	0.0839	0.0833																																134	0.0724	0.0215
135	0.0833	0.1303																																135	0.0716	0.0208
136	0.0833	0.0763																																136	0.0709	0.0201
137	0.0832	0.0981																																137	0.0699	0.0176
138	0.0832	0.1376																																138	0.0692	0.017
139	0.0824	0.105																																139	0.0657	0.0163
140	0.0823	0.108																																140	0.0652	0.014
141	0.0816	0.1214																																141	0.0638	0.0132
142	0.0811	0.0697																																142	0.0636	0.0128
143	0.081	0.0967																																143	0.0612	0.0109
144	0.0798	0.1299																																144	0.0595	0.0101
145	0.0793	0.0711																																145	0.0594	0.0094
146	0.0782	0.0793																																146	0.0577	0.0082
147	0.0754	0.1015																																147	0.0575	0.0067
148	0.0747	0.0785																																148	0.0554	0.0052
149	0.0744	0.0755																																149	0.0544	0.0049
150	0.0737	0.0678																																150	0.0543	0.0038
151	0.0733	0.0803																																151	0.0536	0.0033
152	0.073	0.1016																																152	0.0514	0.0024
153	0.0721	0.0652																																153	0.0514	0.002
154	0.072	0.0728																																154	0.0508	0.001
155	0.0717	0.0944																																155	0.0505
156	0.0715	0.0731																																156	0.0501
157	0.0701	0.0696																																157	0.0491
158	0.07	0.0685																																158	0.0476
159	0.0691	0.0734																																159	0.047
160	0.0689	0.1117																																160	0.0463
161	0.0688	0.0927																																161	0.0461
162	0.0679	0.0431																																162	0.0446
163	0.0678	0.063																																163	0.0443
164	0.0677	0.0674																																164	0.0443
165	0.0675	0.0384																																165	0.042
166	0.0669	0.0494																																166	0.041
167	0.0661	0.062																																167	0.0407
168	0.0657	0.0579																																168	0.0387
169	0.0655	0.1024																																169	0.038
170	0.0648	0.0848																																170	0.0379
171	0.0644	0.0634																																171	0.0367
172	0.0641	0.0633																																172	0.0352
173	0.0633	0.0626																																173	0.0351
174	0.063	0.0919																																174	0.034
175	0.0625	0.0655																																175	0.034
176	0.061	0.0642																																176	0.0334
177	0.0607	0.0999																																177	0.0327
178	0.0607	0.0807																																178	0.0323
179	0.0606	0.0737																																179	0.0313
180	0.0605	0.0436																																180	0.0302
181	0.0598	0.0677																																181	0.0297
182	0.0591	0.0948																																182	0.029
183	0.0579	0.0992																																183	0.0272
184	0.0575	0.0455																																184	0.0261
185	0.0571	0.0528																																185	0.0243
186	0.0568	0.0918																																186	0.0236
187	0.0566	0.03																																187	0.0229
188	0.055	0.0919																																188	0.0224
189	0.055	0.133																																189	0.0215
190	0.054	0.0426																																190	0.0202
191	0.0526	0.0645																																191	0.02
192	0.0521	0.0638																																192	0.0196
193	0.0517	0.0766																																193	0.0196
194	0.0516	0.0718																																194	0.018
195	0.0515	0.0311																																195	0.0171
196	0.0511	0.0404																																196	0.017
197	0.051	0.0628																																197	0.0168
198	0.0509	0.0321																																198	0.0146
199	0.0502	0.0795																																199	0.0113
200	0.049	0.0362																																200	0.0104
201	0.0482	0.0571																																201	0.0081
202	0.0449	0.057																																202	0.0081
203	0.0431	0.0576																																203	0.0062
204	0.0425	0.0679																																204	0.0058
205	0.0424	0.0568																																205	0.0032
206	0.0423	0.0985																																206	0.0024
207	0.0422	0.0458																																207	0.0023
208	0.0418	0.0459																																208	0.0014
209	0.0417	0.0543																																209	0.0013
210	0.0415	0.0018
211	0.0403	0.0456
212	0.0403	0.0531
213	0.0399	0.0494
214	0.0392	0.022
215	0.0384	0.092
216	0.0381	0.0385
217	0.0369	0.0525
218	0.0364	0.043
219	0.0358	0.0029
220	0.0338	0.0373
221	0.0336	0.0478
222	0.0334	0.0307
223	0.0333	0.0534
224	0.0327	0.0348
225	0.0317	0.0212
226	0.0315	0.0453
227	0.0246	0.0199
