# Supplementary material for: Plasticity-induced actin polymerization in the dendritic shaft regulates intracellular AMPA receptor trafficking
Source: eLife. 2024 Aug 15;13:e80622. doi: 10.7554/eLife.80622 (PMC11326776; doi:10.7554/eLife.80622)
Supplement: Figure 1—figure supplement 6—source data 1. [file elife-80622-fig1-figsupp6-data1.xlsx]

## Sheet: Figure 1-figure supplement 6
Figure 1-figure supplement 6-source data 1 - related to Figure 1-figure supplement 6C (bar graph, left) - fraction of GluA1-HT-JF549i particles on the cell membrane exhibiting active transport													Figure 1-figure supplement 6-source data 2 - related to Figure 1-figure supplement 6C (histogram, right) - diffusion coefficients (D) of GluA1-HT-JF549i particles on the cell membrane
	Active Transport												Trajectory	No Treatment	Surface
Dendrite (Neuron)	All	Surface											1	0.9745	1.1712
1	0.3	0											2	0.8817	1.0938
2	0.2	0											3	0.8082	0.9074
3	0.2	0											4	0.7623	0.8711
4	0.36	0											5	0.7442	0.7948
5	0.29	0											6	0.7185	0.7429
6	0.28	0											7	0.6948	0.7097
7	0.16	0.04											8	0.6231	0.6998
8	0.25	0											9	0.5934	0.6774
9	0.29												10	0.5455	0.6606
10	0.22												11	0.5036	0.6349
													12	0.4976	0.6204
													13	0.4824	0.5738
													14	0.4708	0.5476
													15	0.457	0.5336
													16	0.4355	0.5319
													17	0.4169	0.5202
													18	0.3871	0.5104
													19	0.3824	0.4995
													20	0.3794	0.496
													21	0.3515	0.4775
													22	0.3423	0.4772
													23	0.336	0.4702
													24	0.3273	0.4532
													25	0.0749	0.4336
													26	0.3184	0.4273
													27	0.3037	0.4227
													28	0.2911	0.4028
													29	0.2861	0.398
													30	0.2766	0.3901
													31	0.276	0.3833
													32	0.269	0.3703
													33	0.2668	0.3662
													34	0.2661	0.3601
													35	0.2571	0.3466
													36	0.2569	0.3401
													37	0.2563	0.3324
													38	0.254	0.3241
													39	0.2538	0.3142
													40	0.2486	0.3139
													41	0.2454	0.3068
													42	0.2447	0.3054
													43	0.2439	0.2984
													44	0.2405	0.2968
													45	0.2374	0.2956
													46	0.2374	0.2937
													47	0.2338	0.2937
													48	0.2336	0.2869
													49	0.2293	0.2823
													50	0.2277	0.2793
													51	0.2258	0.277
													52	0.2236	0.2749
													53	0.2223	0.2708
													54	0.2202	0.2637
													55	0.2184	0.2633
													56	0.2148	0.2605
													57	0.2141	0.2596
													58	0.2135	0.2595
													59	0.2131	0.2526
													60	0.2056	0.2523
													61	0.2019	0.2499
													62	0.2016	0.248
													63	0.1996	0.2369
													64	0.1991	0.231
													65	0.1953	0.231
													66	0.1952	0.2296
													67	0.1861	0.2205
													68	0.1861	0.2162
													69	0.1816	0.2073
													70	0.1816	0.206
													71	0.1759	0.2034
													72	0.1741	0.2029
													73	0.1702	0.2013
													74	0.1675	0.1987
													75	0.158	0.1965
													76	0.157	0.1907
													77	0.1507	0.1888
													78	0.1501	0.1883
													79	0.1462	0.1747
													80	0.1443	0.1727
													81	0.1424	0.1693
													82	0.1414	0.1625
													83	0.1389	0.1604
													84	0.1387	0.1596
													85	0.138	0.153
													86	0.1341	0.1505
													87	0.134	0.1428
													88	0.1328	0.1387
													89	0.1323	0.1361
													90	0.1283	0.1322
													91	0.1271	0.1307
													92	0.1248	0.1255
													93	0.1221	0.1232
													94	0.1216	0.1223
													95	0.1207	0.1118
													96	0.1203	0.1112
													97	0.1199	0.1072
													98	0.1194	0.101
													99	0.1179	0.0983
													100	0.1179	0.0886
													101	0.1167	0.0742
													102	0.1161	0.0677
													103	0.1118	0.0659
													104	0.1118	0.063
													105	0.111	0.0613
													106	0.1108	0.0612
													107	0.1088	0.0565
													108	0.1085	0.0563
													109	0.1074	0.0553
													110	0.1034	0.0485
													111	0.1033	0.0479
													112	0.1024	0.0467
													113	0.1008	0.0459
													114	0.097	0.0455
													115	0.097	0.0448
													116	0.0949	0.0436
													117	0.0941	0.0391
													118	0.0923	0.0374
													119	0.091	0.0367
													120	0.0892	0.035
													121	0.0833	0.0343
													122	0.0827	0.0316
													123	0.081	0.0311
													124	0.0808	0.0298
													125	0.079	0.0291
													126	0.0785	0.0277
													127	0.0785	0.0254
													128	0.0784	0.0228
													129	0.0777	0.0225
													130	0.0776	0.0209
													131	0.0755	0.0195
													132	0.0747	0.0181
													133	0.0747	0.0163
													134	0.0724	0.016
													135	0.0716	0.0159
													136	0.0709	0.0158
													137	0.0699	0.0147
													138	0.0692	0.0142
													139	0.0657	0.0137
													140	0.0652	0.0122
													141	0.0638	0.0114
													142	0.0636	0.0108
													143	0.0612	0.0101
													144	0.0595	0.0089
													145	0.0594	0.0085
													146	0.0577	0.0081
													147	0.0575	0.0064
													148	0.0554	0.0056
													149	0.0544	0.0051
													150	0.0543	0.0043
													151	0.0536	0.004
													152	0.0514	0.0031
													153	0.0514	0.0025
													154	0.0508	0.0024
													155	0.0505	0.0021
													156	0.0501	0.0021
													157	0.0491	0.0015
													158	0.0476	0.0012
													159	0.047	0.001
													160	0.0463
													161	0.0461
													162	0.0446
													163	0.0443
													164	0.0443
													165	0.042
													166	0.041
													167	0.0407
													168	0.0387
													169	0.038
													170	0.0379
													171	0.0367
													172	0.0352
													173	0.0351
													174	0.034
													175	0.034
													176	0.0334
													177	0.0327
													178	0.0323
													179	0.0313
													180	0.0302
													181	0.0297
													182	0.029
													183	0.0272
													184	0.0261
													185	0.0243
													186	0.0236
													187	0.0229
													188	0.0224
													189	0.0215
													190	0.0202
													191	0.02
													192	0.0196
													193	0.0196
													194	0.018
													195	0.0171
													196	0.017
													197	0.0168
													198	0.0146
													199	0.0113
													200	0.0104
													201	0.0081
													202	0.0081
													203	0.0062
													204	0.0058
													205	0.0032
													206	0.0024
													207	0.0023
													208	0.0014
													209	0.0013
