# Supplementary material for: Plasticity-induced actin polymerization in the dendritic shaft regulates intracellular AMPA receptor trafficking
Source: eLife. 2024 Aug 15;13:e80622. doi: 10.7554/eLife.80622 (PMC11326776; doi:10.7554/eLife.80622)
Supplement: Figure 1—figure supplement 7—source data 1. [file elife-80622-fig1-figsupp7-data1.xlsx]

## Sheet: Figure 1-figure supplement 7
Figure 1-figure supplement 7-source data 1 - related to Figure 1-figure supplement 7 (histogram, right) - diffusion coefficients (D) of GluA1-HT particles that colocalize with GFP-Homer1c
Trajectory	No Treatment	In-Homer1c
1	0.9745	0.0422
2	0.8817	0.0406
3	0.8082	0.0332
4	0.7623	0.0302
5	0.7442	0.0298
6	0.7185	0.0291
7	0.6948	0.0284
8	0.6231	0.0283
9	0.5934	0.0273
10	0.5455	0.0272
11	0.5036	0.027
12	0.4976	0.0268
13	0.4824	0.0257
14	0.4708	0.0246
15	0.457	0.0232
16	0.4355	0.023
17	0.4169	0.0222
18	0.3871	0.0221
19	0.3824	0.0215
20	0.3794	0.0214
21	0.3515	0.0214
22	0.3423	0.021
23	0.336	0.0206
24	0.3273	0.0206
25	0.0749	0.0204
26	0.3184	0.0196
27	0.3037	0.0193
28	0.2911	0.0192
29	0.2861	0.019
30	0.2766	0.0185
31	0.276	0.0184
32	0.269	0.0182
33	0.2668	0.0173
34	0.2661	0.0171
35	0.2571	0.0164
36	0.2569	0.015
37	0.2563	0.0144
38	0.254	0.0144
39	0.2538	0.0141
40	0.2486	0.0138
41	0.2454	0.0137
42	0.2447	0.0135
43	0.2439	0.0126
44	0.2405	0.0126
45	0.2374	0.0122
46	0.2374	0.012
47	0.2338	0.0119
48	0.2336	0.0118
49	0.2293	0.0115
50	0.2277	0.0109
51	0.2258	0.0103
52	0.2236	0.0103
53	0.2223	0.0098
54	0.2202	0.0096
55	0.2184	0.0096
56	0.2148	0.0093
57	0.2141	0.0092
58	0.2135	0.0092
59	0.2131	0.0092
60	0.2056	0.0091
61	0.2019	0.009
62	0.2016	0.0088
63	0.1996	0.0088
64	0.1991	0.0083
65	0.1953	0.0081
66	0.1952	0.0081
67	0.1861	0.0079
68	0.1861	0.0078
69	0.1816	0.0078
70	0.1816	0.0076
71	0.1759	0.0075
72	0.1741	0.0075
73	0.1702	0.0074
74	0.1675	0.007
75	0.158	0.0069
76	0.157	0.0067
77	0.1507	0.0065
78	0.1501	0.0064
79	0.1462	0.0064
80	0.1443	0.0062
81	0.1424	0.0062
82	0.1414	0.0061
83	0.1389	0.0061
84	0.1387	0.0059
85	0.138	0.0058
86	0.1341	0.0057
87	0.134	0.0054
88	0.1328	0.0054
89	0.1323	0.0053
90	0.1283	0.0053
91	0.1271	0.0053
92	0.1248	0.0052
93	0.1221	0.0051
94	0.1216	0.0049
95	0.1207	0.0049
96	0.1203	0.0049
97	0.1199	0.0048
98	0.1194	0.0047
99	0.1179	0.0047
100	0.1179	0.0044
101	0.1167	0.0043
102	0.1161	0.0042
103	0.1118	0.004
104	0.1118	0.004
105	0.111	0.0038
106	0.1108	0.0037
107	0.1088	0.0036
108	0.1085	0.0036
109	0.1074	0.0036
110	0.1034	0.0034
111	0.1033	0.0033
112	0.1024	0.0033
113	0.1008	0.0033
114	0.097	0.0032
115	0.097	0.0031
116	0.0949	0.0028
117	0.0941	0.0028
118	0.0923	0.0027
119	0.091	0.0023
120	0.0892	0.0022
121	0.0833	0.002
122	0.0827	0.002
123	0.081	0.0018
124	0.0808	0.0018
125	0.079	0.0018
126	0.0785	0.0018
127	0.0785	0.0018
128	0.0784	0.0017
129	0.0777	0.0017
130	0.0776	0.0015
131	0.0755	0.0014
132	0.0747	0.0012
133	0.0747	0.0011
134	0.0724	0.0011
135	0.0716	0.0011
136	0.0709
137	0.0699
138	0.0692
139	0.0657
140	0.0652
141	0.0638
142	0.0636
143	0.0612
144	0.0595
145	0.0594
146	0.0577
147	0.0575
148	0.0554
149	0.0544
150	0.0543
151	0.0536
152	0.0514
153	0.0514
154	0.0508
155	0.0505
156	0.0501
157	0.0491
158	0.0476
159	0.047
160	0.0463
161	0.0461
162	0.0446
163	0.0443
164	0.0443
165	0.042
166	0.041
167	0.0407
168	0.0387
169	0.038
170	0.0379
171	0.0367
172	0.0352
173	0.0351
174	0.034
175	0.034
176	0.0334
177	0.0327
178	0.0323
179	0.0313
180	0.0302
181	0.0297
182	0.029
183	0.0272
184	0.0261
185	0.0243
186	0.0236
187	0.0229
188	0.0224
189	0.0215
190	0.0202
191	0.02
192	0.0196
193	0.0196
194	0.018
195	0.0171
196	0.017
197	0.0168
198	0.0146
199	0.0113
200	0.0104
201	0.0081
202	0.0081
203	0.0062
204	0.0058
205	0.0032
206	0.0024
207	0.0023
208	0.0014
209	0.0013
