# Supplementary material for: Plasticity-induced actin polymerization in the dendritic shaft regulates intracellular AMPA receptor trafficking
Source: eLife. 2024 Aug 15;13:e80622. doi: 10.7554/eLife.80622 (PMC11326776; doi:10.7554/eLife.80622)
Supplement: Figure 1—figure supplement 9—source data 1. [file elife-80622-fig1-figsupp9-data1.xlsx]

## Sheet: Figure 1-figure supplement 9
Figure 1-figure supplement 9-source data 1 - related to Figure 1-figure supplement 9 - surface labeling of GluA1-HT after cLTP stimulation
	GluA1-HT-JF549i MFI (AU)
Cell	Control	cLTP
1	146.49	186.45
2	44.01	161.68
3	42.71	128.56
4	74.57	166.24
5	63.29	48.08
6	43.26	161.88
7	31.47	160.83
8	121.43	140.65
