# Supplementary material for: Plasticity-induced actin polymerization in the dendritic shaft regulates intracellular AMPA receptor trafficking
Source: eLife. 2024 Aug 15;13:e80622. doi: 10.7554/eLife.80622 (PMC11326776; doi:10.7554/eLife.80622)
Supplement: Figure 1—figure supplement 10—source data 1. [file elife-80622-fig1-figsupp10-data1.xlsx]

## Sheet: Figure 1-figure supplement 10
Figure 1-figure supplement 10-source data 1 - related to Figure 1-figure supplement 10 - average MSD for GluA1-HT vesicles under control or cLTP conditions
	Control			cLTP
Time (s)	Average	SE	Trajectories	Average	SE	Trajectories
0.05	0.0196	0.0014	48	0.0221	0.0019	41
0.1	0.0298	0.0033	48	0.0355	0.0045	41
0.15	0.0412	0.0063	48	0.0484	0.0073	41
0.2	0.0533	0.0103	48	0.0602	0.01	41
0.25	0.0654	0.0151	48	0.0728	0.013	41
0.3	0.0793	0.0205	48	0.0845	0.0163	41
0.35	0.094	0.0267	48	0.097	0.0195	41
0.4	0.1095	0.0336	48	0.1089	0.0227	41
0.45	0.126	0.0406	48	0.1208	0.0256	41
0.5	0.1429	0.0488	48	0.1332	0.029	41
0.55	0.1595	0.0565	48	0.1431	0.0321	41
0.6	0.1793	0.0657	48	0.1533	0.0347	41
0.65	0.1999	0.0753	48	0.1628	0.0369	41
0.7	0.2179	0.0849	48	0.1699	0.0392	41
0.75	0.2383	0.0952	48	0.1789	0.0413	41
0.8	0.2579	0.1052	48	0.186	0.0432	41
0.85	0.2803	0.1173	48	0.1957	0.0458	41
0.9	0.2994	0.1261	48	0.2055	0.0488	41
0.95	0.3227	0.1382	48	0.2163	0.0515	41
1	0.3411	0.146	48	0.2245	0.054	41
1.05	0.3666	0.1592	48	0.2353	0.0572	41
1.1	0.3878	0.1699	48	0.244	0.06	41
1.15	0.4136	0.1831	48	0.2543	0.0634	41
1.2	0.4364	0.1936	48	0.2666	0.0676	41
1.25	0.4605	0.2046	48	0.2764	0.0707	41
1.3	0.4842	0.2153	48	0.2862	0.0738	41
1.35	0.5058	0.2243	48	0.2959	0.0766	41
1.4	0.531	0.2378	48	0.3048	0.0789	41
1.45	0.5532	0.2481	48	0.3132	0.0815	41
1.5	0.5783	0.2599	48	0.3196	0.083	41
1.55	0.6018	0.2715	48	0.3233	0.0831	41
1.6	0.6258	0.2836	48	0.3292	0.0845	41
1.65	0.6478	0.2955	48	0.3308	0.0848	41
1.7	0.6746	0.3084	48	0.3348	0.0845	41
1.75	0.6994	0.3212	48	0.3394	0.0845	41
1.8	0.7269	0.3345	48	0.3416	0.0846	41
1.85	0.7538	0.3486	48	0.3434	0.0848	41
1.9	0.7794	0.363	48	0.3453	0.0839	41
1.95	0.8081	0.3771	48	0.3444	0.0834	41
2	0.8308	0.392	48	0.3468	0.0834	41
2.05	0.8643	0.4082	48	0.3539	0.085	41
2.1	0.8962	0.4254	48	0.354	0.0845	41
2.15	0.9274	0.443	48	0.3562	0.085	41
2.2	0.9621	0.4611	48	0.3647	0.0869	41
2.25	0.9932	0.4791	48	0.3641	0.0873	41
2.3	1.0281	0.4987	48	0.3664	0.0876	41
2.35	1.0606	0.5172	48	0.3659	0.0872	41
2.4	1.0917	0.5359	48	0.3673	0.0867	41
2.45	1.1264	0.5551	48	0.3659	0.0862	41
2.5	1.1648	0.5762	48	0.3601	0.0853	41
2.55	1.2019	0.597	48	0.3602	0.0836	41
2.6	1.2416	0.6186	48	0.3623	0.0839	41
2.65	1.2794	0.6409	48	0.3586	0.0834	41
2.7	1.3204	0.6649	48	0.3612	0.0838	41
2.75	1.3606	0.6885	48	0.363	0.0852	41
2.8	1.4029	0.7121	48	0.3682	0.0874	41
2.85	1.4466	0.7405	48	0.3697	0.0891	41
2.9	1.4884	0.7626	48	0.3734	0.0911	41
2.95	1.5352	0.7899	48	0.377	0.0932	41
3	1.5813	0.8193	48	0.3859	0.0971	41
3.05	1.6212	0.8403	48	0.3915	0.1004	41
3.1	1.6701	0.8685	48	0.3959	0.1026	41
3.15	1.7233	0.8969	48	0.4078	0.1078	41
3.2	1.7774	0.9257	48	0.415	0.1102	41
3.25	1.8298	0.9546	48	0.4221	0.1138	41
3.3	1.8839	0.9822	48	0.4297	0.1166	41
3.35	1.9337	1.0096	48	0.4331	0.118	41
3.4	1.9901	1.0397	48	0.4369	0.1198	41
3.45	2.0493	1.0708	48	0.4421	0.1223	41
3.5	2.1014	1.0976	48	0.4458	0.1233	41
3.55	2.1547	1.1271	48	0.4479	0.1245	41
3.6	2.2127	1.1586	48	0.4586	0.1258	41
3.65	2.2696	1.1906	48	0.4651	0.127	41
3.7	2.3335	1.222	48	0.4703	0.1283	41
3.75	2.3969	1.2492	48	0.4831	0.1328	41
3.8	2.4587	1.2846	48	0.4892	0.1336	41
3.85	2.5244	1.3177	48	0.4917	0.1333	41
3.9	2.5923	1.354	48	0.4969	0.1359	41
3.95	2.6737	1.4037	48	0.5162	0.1403	41
4	2.7394	1.4369	48	0.5185	0.1416	41
4.05	2.8174	1.474	48	0.5252	0.1427	41
4.1	2.8881	1.5145	48	0.538	0.1458	41
4.15	3.0139	1.5752	48	0.5334	0.1456	41
4.2	3.1505	1.6302	48	0.5301	0.1426	41
4.25	3.2384	1.6758	48	0.5256	0.1405	41
4.3	3.4756	1.7577	48	0.5315	0.1406	41
4.35	3.5651	1.8039	48	0.5191	0.1381	41
4.4	3.7398	1.8682	48	0.5176	0.1369	41
4.45	3.9252	1.9354	48	0.4952	0.1335	41
4.5	4.1255	2.0108	48	0.5046	0.1294	41
4.55	4.2303	2.0631	48	0.4905	0.1291	41
4.6	4.3474	2.112	48	0.4841	0.1291	41
4.65	4.4533	2.1693	48	0.4524	0.1284	41
4.7	4.6709	2.2734	48	0.4707	0.1333	41
4.75	4.8366	2.3649	48	0.4685	0.1377	41
4.8	5.0834	2.4548	48	0.4871	0.1429	41
4.85	5.1938	2.5112	48	0.5104	0.1446	41
4.9	5.3406	2.5887	48	0.5177	0.1468	41
4.95	5.6189	2.6874	48	0.5274	0.1528	41
5	5.7383	2.7524	48	0.5479	0.1592	41
