# Supplementary material for: Plasticity-induced actin polymerization in the dendritic shaft regulates intracellular AMPA receptor trafficking
Source: eLife. 2024 Aug 15;13:e80622. doi: 10.7554/eLife.80622 (PMC11326776; doi:10.7554/eLife.80622)
Supplement: Figure 1—figure supplement 11—source data 1. [file elife-80622-fig1-figsupp11-data1.xlsx]

## Sheet: Figure 1-figure supplement 11
Figure 1-figure supplement 11-source data 1 - related to Figure 1-figure supplement 11 - state-switching probabilities for two-state GluA1-HT vesicles under chemical stimulation
Control
Trajectory	V1 (μm/s)	D1 (μm2/s)	D2 (μm2/s)	K(AT-AT)	K(AT-D)	K(D-AT)	K(D-D)
1	1.3103	0.0624	0.1195	0.3009	0.6991	0.2874	0.7126
2	1.3222	0.0605	0.098	0.5598	0.4402	0.4328	0.5672
3	1.467	0.0268	0.1055	0.6478	0.3522	0.3589	0.6411
4	1.6236	0.0423	0.111	0.7424	0.2576	0.325	0.675
5	1.7315	0.0266	0.0993	0.4676	0.5324	0.3037	0.6963
6	1.7619	0.0211	0.055	0.6985	0.3015	0.2172	0.7828
7	1.8755	0.0582	0.1251	0.7098	0.2902	0.4337	0.5663
8	1.9308	0.051	0.0893	0.909	0.091	0.0609	0.9391
9	1.9905	0.0567	0.1533	0.5799	0.4201	0.5038	0.4962
10	2.033	0.0577	0.1386	0.6089	0.3911	0.4021	0.5979
11	2.1129	0.0299	0.1191	0.6022	0.3978	0.3072	0.6928
12	2.1174	0.0323	0.0563	0.6636	0.3364	0.2838	0.7162
13	2.2007	0.0224	0.0874	0.5502	0.4498	0.4326	0.5674
14	2.2403	0.0302	0.0668	0.6674	0.3326	0.3234	0.6766
15	2.2513	0.0443	0.0693	0.7447	0.2553	0.2263	0.7737
16	2.269	0.0381	0.0752	0.685	0.315	0.2892	0.7108
17	2.2794	0.0255	0.0848	0.6031	0.3969	0.123	0.877
18	2.2826	0.0136	0.0978	0.7039	0.2961	0.3381	0.6619
19	2.4611	0.0481	0.116	0.6009	0.3991	0.2824	0.7176
20	2.4954	0.0211	0.0738	0.6898	0.3102	0.3483	0.6517
21	2.5496	0.054	0.0846	0.5578	0.4422	0.4312	0.5688
22	2.6148	0.0161	0.116	0.6181	0.3819	0.7631	0.2369
23	2.8471	0.014	0.1327	0.751	0.249	0.395	0.605
24	3.0595	0.0116	0.0722	0.785	0.215	0.3801	0.6199
25	3.0868	0.0511	0.1544	0.718	0.282	0.7617	0.2383
26	3.3358	0.0717	0.1788	0.8058	0.1942	0.3001	0.6999
cLTP
Trajectory	V1 (μm/s)	D1 (μm2/s)	D2 (μm2/s)	K(AT-AT)	K(AT-D)	K(D-AT)	K(D-D)
1	0.541	0.0397	0.0422	0.4268	0.5732	0.167	0.833
2	0.763	0.028	0.1028	0.6366	0.3634	0.2133	0.7867
3	0.7738	0.0327	0.0646	0.5394	0.4606	0.1341	0.8659
4	0.8299	0.0633	0.0671	0.5812	0.4188	0.2102	0.7898
5	0.988	0.033	0.0952	0.6149	0.3851	0.0742	0.9258
6	1.1167	0.0409	0.0414	0.8016	0.1984	0	1
7	1.2644	0.0429	0.0797	0.6314	0.3686	0.2891	0.7109
8	1.2702	0.0372	0.0708	0.5339	0.4661	0.2397	0.7603
9	1.3105	0.0397	0.0669	0.6463	0.3537	0.0996	0.9004
10	1.3683	0.044	0.0707	0.6704	0.3296	0.1211	0.8789
11	1.4391	0.0237	0.07	0.8619	0.1381	0	1
12	1.4414	0.0107	0.0645	0.736	0.264	0.1951	0.8049
13	1.5502	0.0382	0.0547	0.7477	0.2523	0.0395	0.9605
14	1.7368	0.0391	0.0441	0.8039	0.1961	0	1
15	1.7403	0.0568	0.0816	0.7731	0.2269	0.0589	0.9411
16	1.7481	0.0462	0.058	0.7798	0.2202	0.0361	0.9639
17	1.7876	0.0289	0.0702	0.6212	0.3788	0.2291	0.7709
18	1.8728	0.0368	0.0858	0.9087	0.0913	0	1
19	1.9802	0.0312	0.055	0.8135	0.1865	0.0715	0.9285
20	2.0377	0.0485	0.0602	0.9109	0.0891	0	1
21	2.0563	0.0404	0.056	0.8288	0.1712	0.0009	0.9991
22	2.1716	0.0512	0.0567	0.8546	0.1454	0	1
23	2.3542	0.0213	0.0741	0.8611	0.1389	0.0195	0.9805
24	2.4247	0.0298	0.0397	0.7498	0.2502	0.0955	0.9045
25	2.4401	0.0566	0.0581	0.8639	0.1361	0.0376	0.9624
26	2.6095	0.0422	0.0558	0.8643	0.1357	0.0218	0.9782
27	2.6831	0.042	0.0589	0.9035	0.0965	0	1
28	2.7194	0.0676	0.0615	0.6784	0.3216	0.081	0.919
29	2.7434	0.0274	0.0591	0.8135	0.1865	0.0195	0.9805
30	2.7499	0.0384	0.0708	0.9148	0.0852	0	1
cLTP+LatA
Trajectory	V1 (μm/s)	D1 (μm2/s)	D2 (μm2/s)	K(AT-AT)	K(AT-D)	K(D-AT)	K(D-D)
1	1.515	0.0497	0.1312	0.6599	0.3401	0.227	0.773
2	1.5475	0.0367	0.0854	0.805	0.195	0.3606	0.6394
3	1.6291	0.0487	0.1223	0.7147	0.2853	0.2901	0.7099
4	1.7233	0.0435	0.1167	0.2891	0.7109	0.2859	0.7141
5	1.7949	0.0398	0.1537	0.6219	0.3781	0.2303	0.7697
6	1.8621	0.0399	0.1236	0.7091	0.2909	0.2396	0.7604
7	1.9108	0.0206	0.1233	0.5699	0.4301	0.2566	0.7434
8	1.9666	0.0444	0.1794	0.6015	0.3985	0.3613	0.6387
9	1.9721	0.0408	0.0989	0.6276	0.3724	0.2502	0.7498
10	2.0282	0.0382	0.1129	0.7181	0.2819	0.278	0.722
11	2.0594	0.0279	0.1823	0.8214	0.1786	0.2692	0.7308
12	2.0621	0.0592	0.0978	0.699	0.301	0.3213	0.6787
13	2.0678	0.0168	0.0971	0.6838	0.3162	0.3258	0.6742
14	2.1301	0.0366	0.0923	0.6697	0.3303	0.2922	0.7078
15	2.164	0.0437	0.0734	0.8042	0.1958	0.3448	0.6552
16	2.3165	0.0329	0.0806	0.7807	0.2193	0.2611	0.7389
17	2.3704	0.0167	0.1207	0.7307	0.2693	0.2602	0.7398
18	2.3759	0.0208	0.0916	0.6292	0.3708	0.3093	0.6907
19	2.4299	0.0471	0.0923	0.8014	0.1986	0.4778	0.5222
20	2.4555	0.0623	0.1408	0.805	0.195	0.387	0.613
21	2.4653	0.0358	0.0744	0.8141	0.1859	0.4594	0.5406
22	2.5079	0.0316	0.1466	0.6577	0.3423	0.3281	0.6719
23	2.6571	0.0254	0.1168	0.8349	0.1651	0.295	0.705
24	2.6641	0.0503	0.0612	0.7394	0.2606	0.4341	0.5659
25	2.6919	0.0209	0.0563	0.829	0.171	0.5732	0.4268
26	2.7332	0.0359	0.1077	0.9022	0.0978	0.2909	0.7091
27	2.7428	0.0551	0.1166	0.638	0.362	0.3017	0.6983
28	3.0697	0.0463	0.1088	0.9534	0.0466	0.2915	0.7085
29	3.1996	0.0505	0.1	0.8822	0.1178	0.4727	0.5273
30	3.4963	0.0372	0.0972	0.892	0.108	0.3936	0.6064
