# Supplementary material for: Plasticity-induced actin polymerization in the dendritic shaft regulates intracellular AMPA receptor trafficking
Source: eLife. 2024 Aug 15;13:e80622. doi: 10.7554/eLife.80622 (PMC11326776; doi:10.7554/eLife.80622)
Supplement: Figure 1—source data 1. [file elife-80622-fig1-data1.xlsx]

## Sheet: Figure 1
Figure 1-source data 1 - related to Figure 1E - Pie charts - fraction of GluA1-HT vesicles with active transport vs diffusion								Figure 1-source data 2 - related to Figure 1E histograms - diffusion coefficients (D, μm2/s) of GluA1-HT vesicles
	Control		cLTP					Trajectory	Control	cLTP
Experiment	Active Transport	Diffusion	Active Transport	Diffusion				1	0.4315	0.2098
1	0.5	0.5	0.18	0.82				2	0.3766	0.2087
2	0.26	0.72	0.21	0.79				3	0.3634	0.1972
3	0.45	0.55	0.1	0.9				4	0.3505	0.191
4	0.27	0.73	0.14	0.86				5	0.3442	0.1818
5	0.42	0.58	0.14	0.86				6	0.3411	0.1799
6	0.43	0.57	0.13	0.87				7	0.3404	0.1766
7	0.27	0.73	0.14	0.86				8	0.3131	0.1688
8	0.38	0.62	0.1	0.9				9	0.3121	0.1684
9	0.36	0.64	0.08	0.92				10	0.302	0.1656
10	0.3	0.7	0.08	0.92				11	0.2965	0.164
11	0.45	0.55	0.19	0.81				12	0.2925	0.1637
12	0.38	0.62	0.19	0.81				13	0.2915	0.1614
13			0.08	0.92				14	0.2815	0.1614
14			0.07	0.93				15	0.2696	0.1612
								16	0.2687	0.1582
								17	0.2566	0.157
								18	0.2457	0.1521
								19	0.2416	0.1514
								20	0.241	0.15
								21	0.2341	0.1491
								22	0.2196	0.1483
								23	0.2184	0.1468
								24	0.2134	0.1445
								25	0.2065	0.1434
								26	0.195	0.1427
								27	0.1918	0.1399
								28	0.1895	0.1392
								29	0.1892	0.1365
								30	0.1872	0.1353
								31	0.187	0.1337
								32	0.1838	0.1336
								33	0.1837	0.1314
								34	0.1829	0.1313
								35	0.1826	0.1301
								36	0.1813	0.1295
								37	0.1747	0.1292
								38	0.1744	0.1287
								39	0.1737	0.1281
								40	0.1681	0.1279
								41	0.1654	0.1279
								42	0.161	0.1276
								43	0.1578	0.1263
								44	0.1556	0.1226
								45	0.1549	0.1199
								46	0.1539	0.1198
								47	0.1527	0.1191
								48	0.1524	0.1181
								49	0.1518	0.1179
								50	0.1515	0.1177
								51	0.1513	0.1177
								52	0.1488	0.1174
								53	0.1463	0.1165
								54	0.1457	0.1163
								55	0.1453	0.1157
								56	0.1448	0.1149
								57	0.1438	0.1148
								58	0.1432	0.1144
								59	0.1423	0.1142
								60	0.1415	0.1141
								61	0.1407	0.1131
								62	0.1398	0.1129
								63	0.138	0.1129
								64	0.1361	0.1116
								65	0.1359	0.1103
								66	0.1355	0.1103
								67	0.135	0.1098
								68	0.1323	0.1097
								69	0.132	0.1096
								70	0.1317	0.1092
								71	0.1314	0.1083
								72	0.1309	0.1054
								73	0.1303	0.105
								74	0.1298	0.1033
								75	0.1295	0.1028
								76	0.1292	0.1026
								77	0.129	0.1018
								78	0.1236	0.1017
								79	0.1234	0.1017
								80	0.1233	0.0993
								81	0.1216	0.0989
								82	0.1213	0.0987
								83	0.1213	0.0986
								84	0.1209	0.0983
								85	0.1201	0.0977
								86	0.1197	0.0972
								87	0.1194	0.0971
								88	0.118	0.0971
								89	0.117	0.097
								90	0.1168	0.097
								91	0.1157	0.0968
								92	0.1157	0.0968
								93	0.1148	0.0966
								94	0.1138	0.0953
								95	0.1134	0.094
								96	0.1132	0.094
								97	0.1125	0.0939
								98	0.1106	0.0938
								99	0.11	0.0902
								100	0.1097	0.0902
								101	0.1095	0.09
								102	0.1085	0.0899
								103	0.1082	0.0895
								104	0.1082	0.0891
								105	0.1081	0.0891
								106	0.1074	0.0888
								107	0.1071	0.0887
								108	0.1048	0.0887
								109	0.1047	0.0886
								110	0.1026	0.0886
								111	0.102	0.0884
								112	0.102	0.0883
								113	0.0995	0.0882
								114	0.0972	0.0881
								115	0.0951	0.0877
								116	0.095	0.0874
								117	0.0943	0.0873
								118	0.0935	0.0872
								119	0.0935	0.0864
								120	0.0926	0.0861
								121	0.0915	0.0858
								122	0.0914	0.0857
								123	0.0908	0.0856
								124	0.0903	0.0856
								125	0.0902	0.0848
								126	0.0895	0.0847
								127	0.0893	0.0845
								128	0.0892	0.0842
								129	0.0886	0.0834
								130	0.088	0.0823
								131	0.0861	0.0823
								132	0.0857	0.0822
								133	0.084	0.0822
								134	0.0839	0.0821
								135	0.0833	0.0819
								136	0.0833	0.0805
								137	0.0832	0.0803
								138	0.0832	0.0802
								139	0.0824	0.0796
								140	0.0823	0.0793
								141	0.0816	0.0787
								142	0.0811	0.0786
								143	0.081	0.0784
								144	0.0798	0.0782
								145	0.0793	0.078
								146	0.0782	0.0779
								147	0.0754	0.0776
								148	0.0747	0.0767
								149	0.0744	0.0761
								150	0.0737	0.0757
								151	0.0733	0.0754
								152	0.073	0.0752
								153	0.0721	0.0746
								154	0.072	0.0744
								155	0.0717	0.0742
								156	0.0715	0.074
								157	0.0701	0.0737
								158	0.07	0.0724
								159	0.0691	0.0723
								160	0.0689	0.0722
								161	0.0688	0.0722
								162	0.0679	0.0721
								163	0.0678	0.072
								164	0.0677	0.072
								165	0.0675	0.0717
								166	0.0669	0.0714
								167	0.0661	0.0711
								168	0.0657	0.0711
								169	0.0655	0.0711
								170	0.0648	0.0703
								171	0.0644	0.0691
								172	0.0641	0.069
								173	0.0633	0.0688
								174	0.063	0.0687
								175	0.0625	0.0684
								176	0.061	0.0683
								177	0.0607	0.0677
								178	0.0607	0.0675
								179	0.0606	0.0665
								180	0.0605	0.0665
								181	0.0598	0.0661
								182	0.0591	0.0659
								183	0.0579	0.0656
								184	0.0575	0.0655
								185	0.0571	0.0654
								186	0.0568	0.0654
								187	0.0566	0.0654
								188	0.055	0.0649
								189	0.055	0.0648
								190	0.054	0.0645
								191	0.0526	0.0644
								192	0.0521	0.0642
								193	0.0517	0.064
								194	0.0516	0.0639
								195	0.0515	0.0637
								196	0.0511	0.0626
								197	0.051	0.0626
								198	0.0509	0.0622
								199	0.0502	0.0621
								200	0.049	0.0621
								201	0.0482	0.0618
								202	0.0449	0.0615
								203	0.0431	0.0614
								204	0.0425	0.0613
								205	0.0424	0.0611
								206	0.0423	0.061
								207	0.0422	0.0609
								208	0.0418	0.0606
								209	0.0417	0.0606
								210	0.0415	0.0602
								211	0.0403	0.0602
								212	0.0403	0.06
								213	0.0399	0.06
								214	0.0392	0.0596
								215	0.0384	0.0592
								216	0.0381	0.0591
								217	0.0369	0.0583
								218	0.0364	0.0582
								219	0.0358	0.0572
								220	0.0338	0.057
								221	0.0336	0.0568
								222	0.0334	0.0564
								223	0.0333	0.0563
								224	0.0327	0.0563
								225	0.0317	0.0558
								226	0.0315	0.0553
								227	0.0246	0.0553
								228		0.055
								229		0.0544
								230		0.0542
								231		0.0537
								232		0.0535
								233		0.0532
								234		0.0529
								235		0.0525
								236		0.0524
								237		0.0522
								238		0.0521
								239		0.0516
								240		0.0513
								241		0.0513
								242		0.0513
								243		0.0511
								244		0.051
								245		0.0507
								246		0.0506
								247		0.0506
								248		0.0497
								249		0.0494
								250		0.0492
								251		0.0491
								252		0.0488
								253		0.0487
								254		0.0485
								255		0.0483
								256		0.048
								257		0.048
								258		0.0479
								259		0.0478
								260		0.0473
								261		0.0472
								262		0.0471
								263		0.047
								264		0.047
								265		0.0468
								266		0.0463
								267		0.0462
								268		0.0461
								269		0.0459
								270		0.0457
								271		0.0454
								272		0.0435
								273		0.0432
								274		0.0427
								275		0.0427
								276		0.0426
								277		0.0422
								278		0.0419
								279		0.0418
								280		0.0416
								281		0.0414
								282		0.0414
								283		0.0413
								284		0.0412
								285		0.0411
								286		0.0411
								287		0.0407
								288		0.0407
								289		0.0407
								290		0.0401
								291		0.04
								292		0.0399
								293		0.0398
								294		0.0396
								295		0.0395
								296		0.0393
								297		0.0392
								298		0.0387
								299		0.0386
								300		0.0383
								301		0.038
								302		0.0379
								303		0.0375
								304		0.0371
								305		0.0366
								306		0.0365
								307		0.0364
								308		0.0362
								309		0.0359
								310		0.0358
								311		0.0356
								312		0.0353
								313		0.035
								314		0.0348
								315		0.0347
								316		0.0346
								317		0.0344
								318		0.0341
								319		0.0339
								320		0.0338
								321		0.0337
								322		0.0335
								323		0.0334
								324		0.0333
								325		0.0331
								326		0.0328
								327		0.0326
								328		0.032
								329		0.0319
								330		0.0316
								331		0.0309
								332		0.0307
								333		0.0301
								334		0.0297
								335		0.0296
								336		0.029
								337		0.0289
								338		0.0286
								339		0.0284
								340		0.0282
								341		0.0276
								342		0.0274
								343		0.0273
								344		0.027
								345		0.0269
								346		0.0264
								347		0.0259
								348		0.0253
								349		0.0249
								350		0.0243
								351		0.0242
								352		0.024
								353		0.023
								354		0.0229
								355		0.0228
								356		0.0225
								357		0.0224
								358		0.022
								359		0.0219
								360		0.0201
