# Supplementary material for: Plasticity-induced actin polymerization in the dendritic shaft regulates intracellular AMPA receptor trafficking
Source: eLife. 2024 Aug 15;13:e80622. doi: 10.7554/eLife.80622 (PMC11326776; doi:10.7554/eLife.80622)
Supplement: Figure 2—figure supplement 1—source data 1. [file elife-80622-fig2-figsupp1-data1.xlsx]

## Sheet: Figure 2-figure supplement 1
Figure 2-figure supplement 1-source data 1 - related to Figure 2-figure supplement 1C-E - ΔF/Fi of GCaMP7s in a targeted spine, a neighboring spine, and in the dendritic shaft after MNI-glutamate uncaging
	ΔF/Fi of GCaMP7s in an example uncaging experiment					Average ΔF/Fi of GCaMP7s											Peak ΔF/Fi of GCaMP7s
Time (ms)	Spine	Neighbor	Shaft		Time (ms)	Spine			Neighbor			Body					Targeted spine					Neighbor
						Average	Std dev	Experiments	Average	Std dev	Experiments	Average	Std dev	Experiments		Power (%)	1	2	3	4	5	1	2	3	4	5
0	0	0	0		0	0	0	9	0	0	9	0	0	9		0	0	0	0	0	0	0	0	0	0	0
50	-0.012	-0.008	0.011		50	0.006	0.02	9	0.009	0.027	9	0.01	0.019	9		10	0.1	0.013	0.15	0	0	0	0	0	0	0
100	-0.009	-0.034	0.011		100	-0.004	0.021	9	-0.001	0.033	9	-0.003	0.01	9		20	0.15	0.192	0.224	0	0.26	0	0	0	0	0
150	-0.028	-0.09	-0.005		150	-0.013	0.018	9	-0.005	0.023	9	0.003	0.017	9		30	0.363	0.488	0.321	0.614	0.52	0	0	0	0	0
200	-0.021	-0.093	-0.024		200	-0.014	0.027	9	-0.003	0.024	9	0	0.017	9		40	0.653	0.844	0.692	0.723	0.825	0	0.146	0.203	0.04	0.087
250	-0.014	-0.081	-0.017		250	-0.007	0.026	9	-0.006	0.043	9	-0.01	0.026	9		50	0.741	0.796	0.872	1.224	1.114	0.443	0.244	0.44	0.102	0.313
300	0.036	-0.042	0.002		300	-0.014	0.028	9	-0.004	0.034	9	-0.007	0.027	9		100	1.106	1.597	1.876	1.92	2.3	0.602	0.896	0.466	0.818	0.627
350	0.027	-0.066	0.012		350	-0.012	0.026	9	-0.005	0.036	9	-0.004	0.026	9
400	0.024	-0.058	0.002		400	-0.018	0.036	9	0.013	0.058	9	0.002	0.026	9
450	-0.033	-0.081	-0.009		450	-0.025	0.035	9	0.036	0.135	9	-0.001	0.036	9
500	-0.037	-0.088	-0.011		500	-0.02	0.038	9	0.027	0.079	9	0.01	0.032	9
550	-0.054	-0.109	0.005		550	-0.03	0.044	9	-0.001	0.043	9	0.008	0.042	9
600	-0.069	-0.102	0.019		600	-0.018	0.046	9	0.005	0.045	9	0.005	0.032	9
650	-0.059	-0.09	0.027		650	-0.017	0.045	9	-0.015	0.039	9	0.01	0.035	9
700	-0.057	-0.101	0.027		700	-0.012	0.048	9	-0.011	0.035	9	0.01	0.032	9
750	-0.057	-0.056	0.004		750	-0.02	0.052	9	-0.011	0.051	9	0.009	0.034	9
800	-0.068	-0.01	0.011		800	-0.017	0.054	9	-0.002	0.037	9	0.009	0.033	9
850	-0.047	0.043	0.017		850	-0.008	0.053	9	-0.002	0.05	9	0.009	0.029	9
900	0.127	0.055	0.035		900	-0.01	0.049	9	0.002	0.048	9	0.019	0.033	9
950	0.377	0.065	0.038		950	0.852	0.335	9	0.006	0.053	9	0.011	0.035	9
1000	0.629	0.089	0.049		1000	0.439	0.172	9	0.007	0.039	9	0.021	0.052	9
1050	0.714	0.077	0.059		1050	0.427	0.163	9	0.017	0.06	9	0.03	0.082	9
1100	0.696	0.084	0.067		1100	0.382	0.169	9	0.02	0.071	9	0.045	0.086	9
1150	0.639	0.103	0.069		1150	0.344	0.179	9	0.003	0.08	9	0.046	0.108	9
1200	0.628	0.075	0.074		1200	0.312	0.175	9	0.005	0.073	9	0.055	0.1	9
1250	0.595	0.02	0.056		1250	0.277	0.172	9	0.01	0.072	9	0.054	0.104	9
1300	0.548	-0.066	0.044		1300	0.255	0.162	9	-0.007	0.07	9	0.062	0.106	9
1350	0.47	-0.08	0.04		1350	0.231	0.166	9	-0.007	0.072	9	0.053	0.102	9
1400	0.43	-0.082	0.054		1400	0.207	0.162	9	0.015	0.077	9	0.056	0.106	9
1450	0.417	-0.059	0.071		1450	0.193	0.159	9	0	0.075	9	0.049	0.111	9
1500	0.384	-0.048	0.076		1500	0.172	0.164	9	0.002	0.081	9	0.042	0.098	9
1550	0.319	-0.021	0.065		1550	0.158	0.167	9	0.006	0.11	9	0.039	0.086	9
1600	0.265	-0.005	0.041		1600	0.142	0.159	9	0.015	0.099	9	0.04	0.079	9
1650	0.263	-0.012	0.039		1650	0.136	0.156	9	0.016	0.102	9	0.044	0.084	9
1700	0.272	-0.009	0.044		1700	0.121	0.156	9	0	0.058	9	0.042	0.082	9
1750	0.251	-0.02	0.057		1750	0.114	0.15	9	-0.025	0.052	9	0.037	0.093	9
1800	0.189	-0.036	0.048		1800	0.104	0.142	9	-0.014	0.051	9	0.028	0.074	9
1850	0.151	-0.079	0.047		1850	0.106	0.139	9	-0.01	0.054	9	0.033	0.081	9
1900	0.109	-0.117	0.025		1900	0.1	0.141	9	-0.024	0.066	9	0.026	0.071	9
1950	0.098	-0.061	0.025		1950	0.087	0.139	9	0.001	0.057	9	0.032	0.071	9
2000	0.092	-0.06	0.026		2000	0.085	0.139	9	-0.011	0.062	9	0.029	0.067	9
2050	0.097	-0.068	0.041		2050	0.073	0.133	9	-0.006	0.053	9	0.021	0.073	9
2100	0.1	-0.146	0.061		2100	0.076	0.146	9	-0.009	0.051	9	0.023	0.075	9
2150	0.078	-0.165	0.064		2150	0.077	0.138	9	-0.006	0.044	9	0.026	0.08	9
2200	0.081	-0.153	0.066		2200	0.068	0.137	9	-0.009	0.047	9	0.034	0.083	9
2250	0.043	-0.125	0.045		2250	0.067	0.141	9	0.007	0.043	9	0.032	0.083	9
2300	0.072	-0.068	0.038		2300	0.07	0.139	9	-0.013	0.039	9	0.027	0.071	9
2350	0.072	-0.073	0.045		2350	0.064	0.137	9	-0.012	0.053	9	0.029	0.074	9
2400	0.088	-0.04	0.058		2400	0.058	0.132	9	-0.019	0.043	9	0.025	0.074	9
2450	0.079	-0.015	0.071		2450	0.067	0.126	9	-0.013	0.054	9	0.025	0.067	9
2500	0.06	0.024	0.069		2500	0.054	0.133	9	-0.011	0.046	9	0.013	0.074	9
2550	0.048	-0.01	0.057		2550	0.067	0.127	9	-0.011	0.046	9	0.029	0.07	9
2600	0.025	-0.073	0.053		2600	0.061	0.148	9	-0.018	0.06	9	0.025	0.068	9
2650	0.028	-0.135	0.039		2650	0.06	0.141	9	-0.018	0.045	9	0.026	0.079	9
2700	0.036	-0.139	0.039		2700	0.069	0.137	9	-0.018	0.05	9	0.028	0.071	9
2750	0.053	-0.14	0.044		2750	0.057	0.128	9	-0.023	0.056	9	0.032	0.067	9
2800	0.067	-0.117	0.06		2800	0.066	0.129	9	0.003	0.06	9	0.024	0.071	9
2850	0.08	-0.09	0.075		2850	0.049	0.131	9	-0.006	0.056	9	0.032	0.08	9
2900	0.058	-0.073	0.067		2900	0.058	0.134	9	-0.007	0.054	9	0.028	0.073	9
2950	0.045	-0.076	0.06		2950	0.062	0.144	9	-0.015	0.046	9	0.038	0.084	9
3000	0.037	-0.122	0.044		3000	0.058	0.139	9	-0.018	0.068	9	0.042	0.08	9
3050	0.034	-0.154	0.047		3050	0.059	0.127	9	-0.032	0.054	9	0.037	0.097	9
3100	0.032	-0.181	0.047		3100	0.049	0.122	9	-0.023	0.09	9	0.032	0.099	9
3150	0.012	-0.165	0.061		3150	0.044	0.119	9	-0.023	0.081	9	0.03	0.09	9
3200	0.001	-0.168	0.072		3200	0.047	0.125	9	-0.025	0.051	9	0.037	0.096	9
3250	0.023	-0.146	0.084		3250	0.05	0.129	9	-0.024	0.058	9	0.035	0.096	9
3300	0.042	-0.192	0.07		3300	0.052	0.134	9	-0.006	0.049	9	0.04	0.104	9
3350	0.069	-0.197	0.045		3350	0.051	0.121	9	-0.022	0.07	9	0.047	0.104	9
3400	0.062	-0.212	0.023		3400	0.04	0.124	9	-0.024	0.058	9	0.038	0.1	9
3450	0.081	-0.211	0.029		3450	0.054	0.131	9	-0.012	0.055	9	0.039	0.095	9
3500	0.066	-0.243	0.04		3500	0.054	0.125	9	-0.005	0.046	9	0.039	0.111	9
3550	0.055	-0.267	0.042		3550	0.053	0.116	9	0.001	0.049	9	0.043	0.091	9
3600	0.01	-0.273	0.031		3600	0.051	0.121	9	0.001	0.068	9	0.041	0.096	9
3650	-0.022	-0.291	0.007		3650	0.045	0.118	9	-0.016	0.065	9	0.037	0.088	9
3700	-0.041	-0.31	0.003		3700	0.045	0.125	9	-0.002	0.059	9	0.041	0.092	9
3750	-0.015	-0.274	0.004		3750	0.05	0.119	9	-0.002	0.054	9	0.04	0.092	9
3800	0.004	-0.22	0.013		3800	0.044	0.124	9	-0.021	0.066	9	0.033	0.081	9
3850	0.003	-0.133	0.02		3850	0.052	0.122	9	-0.021	0.059	9	0.039	0.082	9
3900	-0.006	-0.06	0.014		3900	0.054	0.118	9	-0.014	0.054	9	0.045	0.091	9
3950	-0.027	-0.006	0.011		3950	0.051	0.121	9	-0.033	0.076	9	0.043	0.089	9
4000	-0.044	-0.002	0.005		4000	0.058	0.123	9	-0.032	0.084	9	0.053	0.104	9
4050	-0.053	-0.004	0.008		4050	0.055	0.131	9	-0.027	0.065	9	0.05	0.106	9
4100	-0.037	0.021	-0.01		4100	0.059	0.123	9	-0.013	0.042	9	0.054	0.103	9
4150	-0.034	0.038	-0.029		4150	0.053	0.126	9	-0.01	0.051	9	0.052	0.106	9
4200	-0.009	0	-0.043		4200	0.058	0.119	9	-0.003	0.054	9	0.05	0.092	9
4250	0.015	-0.082	-0.027		4250	0.047	0.114	9	-0.012	0.045	9	0.047	0.094	9
4300	0.025	-0.138	-0.014		4300	0.058	0.124	9	-0.014	0.054	9	0.041	0.089	9
4350	-0.016	-0.181	-0.002		4350	0.053	0.121	9	-0.018	0.074	9	0.052	0.091	9
4400	-0.04	-0.183	0.003		4400	0.058	0.12	9	-0.008	0.05	9	0.032	0.094	9
4450	-0.044	-0.176	0.028		4450	0.054	0.13	9	-0.007	0.07	9	0.036	0.092	9
4500	-0.019	-0.125	0.044		4500	0.056	0.139	9	-0.007	0.05	9	0.036	0.084	9
4550	0.007	-0.047	0.054		4550	0.06	0.133	9	-0.029	0.061	9	0.037	0.089	9
4600	0.041	0.015	0.047		4600	0.052	0.137	9	-0.002	0.078	9	0.031	0.085	9
4650	0.044	-0.037	0.031		4650	0.058	0.132	9	-0.023	0.097	9	0.034	0.088	9
4700	0.052	-0.114	0.014		4700	0.06	0.138	9	-0.028	0.058	9	0.033	0.094	9
4750	0.045	-0.186	-0.007		4750	0.049	0.127	9	-0.007	0.054	9	0.033	0.098	9
4800	0.034	-0.193	-0.011		4800	0.054	0.127	9	0.003	0.057	9	0.036	0.095	9
4850	-0.015	-0.184	-0.025		4850	0.053	0.129	9	-0.015	0.082	9	0.041	0.093	9
4900	-0.065	-0.195	-0.033		4900	0.044	0.13	9	-0.003	0.063	9	0.04	0.099	9
Figure 2-figure supplement 1-source data 2 - related to Figure 2-figure supplement 1H - expansion of spine head area (μm2) in targeted spines after MNI-glutamate uncaging
	Targeted spine		Neighboring Spine		No MNI
Spine	Pre	Post	Pre	Post	Pre	Post
1	0.87	2.64	1.2	1.18	1.84	1.54
2	1.82	2.92	2.43	2.46	2.13	1.95
3	0.95	1.84	0.61	0.74	1.64	1.54
4	2.82	4.4	2.61	2.84	1.36	1.51
5	1.02	2.2	0.79	0.82	1.59	1.41
6	1.15	2.84	0.85	0.85	1.54	1.95
7	1.54	3.2	0.95	0.97	1.31	1.13
8	1.46	3.1	0.49	0.56	1.33	1.43
9	1.38	2.84	1.28	1.08	1.31	1.28
