# Supplementary material for: Plasticity-induced actin polymerization in the dendritic shaft regulates intracellular AMPA receptor trafficking
Source: eLife. 2024 Aug 15;13:e80622. doi: 10.7554/eLife.80622 (PMC11326776; doi:10.7554/eLife.80622)
Supplement: Figure 2—figure supplement 2—source data 1. [file elife-80622-fig2-figsupp2-data1.xlsx]

## Sheet: Figure 2-figure supplement 1
Figure 2-figure supplement 2-source data 1 - related to Figure 2-figure supplement 2C - GluA1-HT-JF646 MFI (AU) before and after sLTP stimulation
	MNI		No MNI
Spine	Pre	Post	Pre	Post
1	98.17	166.09	135.18	140.77
2	81.77	137.86	79.86	72.13
3	78.7	107.63	84.96	75.72
4	82.05	150.65	83.72	87.97
5	74.3	112.83	65.33	68.58
6	71.5	109.44	111.43	99.83
7	101.09	169.7
