# Supplementary material for: Plasticity-induced actin polymerization in the dendritic shaft regulates intracellular AMPA receptor trafficking
Source: eLife. 2024 Aug 15;13:e80622. doi: 10.7554/eLife.80622 (PMC11326776; doi:10.7554/eLife.80622)
Supplement: Figure 2—figure supplement 3—source data 1. [file elife-80622-fig2-figsupp3-data1.xlsx]

## Sheet: Figure 2-figure supplement 3
Figure 2-figure supplement 3-source data 1 - related to Figure 2-figure supplement 3A (Line graph, bottom left) - spine head area (μm2) of targeted spine 10 minutes after the cessation of sLTP																				Figure 2-figure supplement 3-source data 3 - related to Figure 2-figure supplement 3A (histogram, bottom right) - Diffusion coefficients (D) of GluA1-HT vesicles in zone 1 10 minutes after the cessation of sLTP																			Figure 2-figure supplement 3-source data 5 - related to Figure 2-figure supplement 3C - diffusion coefficient (D, μm2/s) for GluA1-HT vesicles
Spine	Pre	Post	Post+10 min																	Trajectory	Post+10 min																		Trajectory	sLTP 1	No MNI 1	No MNI 2+3
1	0.56	1.66	1.72																	1	0.2692																		1	0.2137	0.3085	0.3154
2	1.08	2.28	1.84																	2	0.2137																		2	0.1849	0.269	0.2761
3	0.85	1.95	1.89																	3	0.1734																		3	0.1734	0.2591	0.2723
4	0.54	1.36	1.33																	4	0.1664																		4	0.1664	0.2419	0.2723
5	1.43	2.18	2.07																	5	0.1329																		5	0.155	0.2375	0.2616
6	1.15	2.1	1.72																	6	0.1323																		6	0.1484	0.2369	0.2526
																				7	0.1221																		7	0.1387	0.2203	0.2496
																				8	0.1214																		8	0.1264	0.2005	0.2488
																				9	0.1194																		9	0.125	0.1945	0.2114
																				10	0.1132																		10	0.1241	0.1888	0.2055
Figure 2-figure supplement 3-source data 2 - related to Figure 2-figure supplement 3A (bar graph, bottom center) - fraction of GluA1-HT vesicles exhibiting active transport in each zone 10 minutes after the cessation of sLTP																				11	0.1104																		11	0.1194	0.1789	0.1877
	Post			Post+10 min																12	0.1089																		12	0.1132	0.1774	0.1813
Zone	Average	Std dev	Experiments	Average	Std dev	Experiments														13	0.1082																		13	0.1115	0.1711	0.1804
1	0.07	0.1	9	0.05	0.08	6														14	0.1022																		14	0.1104	0.1664	0.1725
2	0.41	0.12	9	0.34	0.11	6														15	0.0937																		15	0.1068	0.1636	0.1677
3	0.36	0.09	9	0.43	0.1	6														16	0.0925																		16	0.1022	0.1513	0.162
																				17	0.0913																		17	0.0988	0.1509	0.1549
																				18	0.0873																		18	0.0945	0.1403	0.1524
Figure 2-figure supplement 3-source data 4 - related to Figure 2-figure supplement 3B - fraction of GluA1-HT vesicles exhibiting active transport in each zone after sLTP in the absence of MNI-glutamate																				19	0.0837																		19	0.0937	0.1344	0.1512
	Zone 1		Zone 2		Zone 3															20	0.0824																		20	0.0932	0.1329	0.1351
Experiment	Pre	Post	Pre	Post	Pre	Post														21	0.0791																		21	0.0898	0.1301	0.1325
1	0.25	0.17	0.38	0.4	0.43	0.6														22	0.077																		22	0.0873	0.1286	0.1297
2	0.33	0.33	0.43	0.33	0.5	0.33														23	0.0738																		23	0.0853	0.1278	0.1259
3	0.4	0.5	0.5	0.6	0.29	0.43														24	0.0698																		24	0.0837	0.1243	0.1222
4	0.38	0.4	0.33	0.43	0.43	0.5														25	0.0664																		25	0.0829	0.1215	0.1168
5	0.43	0.5	0.43	0.4	0.4	0.29														26	0.0656																		26	0.0804	0.1214	0.1167
6	0.57	0.6	0.4	0.5	0.4	0.33														27	0.0632																		27	0.0792	0.1191	0.1166
																				28	0.0618																		28	0.0773	0.1171	0.1142
																				29	0.0603																		29	0.0771	0.1146	0.1141
																				30	0.0587																		30	0.077	0.1116	0.1126
																				31	0.0575																		31	0.0761	0.1087	0.1102
																				32	0.0555																		32	0.0753	0.1035	0.1074
																				33	0.0532																		33	0.0698	0.1015	0.1043
																				34	0.0468																		34	0.069	0.0956	0.101
																				35	0.0464																		35	0.0672	0.0925	0.1003
																				36	0.0451																		36	0.0665	0.091	0.0935
																				37	0.0434																		37	0.0661	0.0887	0.0902
																				38	0.0388																		38	0.0656	0.0837	0.0882
																				39	0.0381																		39	0.065	0.0823	0.0854
																				40	0.0346																		40	0.0632	0.0764	0.0803
																				41	0.0325																		41	0.0614	0.0687	0.0744
																				42	0.0247																		42	0.0603	0.0632	0.0726
																				43	0.0239																		43	0.0575	0.0617	0.067
																				44	0.0222																		44	0.0566	0.0586	0.0666
																				45	0.0216																		45	0.0561	0.055	0.064
																				46	0.02166																		46	0.0556	0.0538	0.0623
																				47	0.02042																		47	0.0538	0.0488	0.0617
																																							48	0.0533	0.0433	0.0592
																																							49	0.0528	0.0381	0.059
																																							50	0.0477	0.0336	0.0567
																																							51	0.0469	0.0241	0.0553
																																							52	0.0462	0.0222	0.055
																																							53	0.0451		0.0489
																																							54	0.0446		0.0487
																																							55	0.0425		0.0482
																																							56	0.0397		0.0388
																																							57	0.0387		0.035
																																							58	0.037		0.0332
																																							59	0.0347		0.0293
																																							60	0.0332		0.0253
																																							61	0.0325		0.0245
																																							62	0.0309		0.0205
																																							63	0.0275
																																							64	0.024
																																							65	0.0217
																																							66	0.02
