# Supplementary material for: Plasticity-induced actin polymerization in the dendritic shaft regulates intracellular AMPA receptor trafficking
Source: eLife. 2024 Aug 15;13:e80622. doi: 10.7554/eLife.80622 (PMC11326776; doi:10.7554/eLife.80622)
Supplement: Figure 2—figure supplement 4—source data 1. [file elife-80622-fig2-figsupp4-data1.xlsx]

## Sheet: Figure 2-figure supplement 4
Figure 2-figure supplement 4-source data 1 - related to Figure 2-figure supplement 4 - state-switching probabilities for two-state GluA1-HT vesicles after sLTP
No MNI - Pre
Trajectory	V1 (μm/s)	D1 (μm2/s)	D2 (μm2/s)	K(AT-AT)	K(AT-D)	K(D-AT)	K(D-D)
1	1.7386	0.0498	0.0813	0.6349	0.3651	0.2889	0.7111
2	1.8062	0.0467	0.0723	0.7027	0.2973	0.3216	0.6784
3	1.976	0.0322	0.1403	0.6731	0.3269	0.3292	0.6708
4	2.1837	0.0343	0.1185	0.755	0.245	0.2718	0.7282
5	2.3469	0.0601	0.0665	0.7858	0.2142	0.2722	0.7278
6	2.4312	0.0459	0.124	0.763	0.237	0.3207	0.6793
7	3.0521	0.0298	0.0933	0.8124	0.1876	0.2617	0.7383
No MNI - Post
Trajectory	V1 (μm/s)	D1 (μm2/s)	D2 (μm2/s)	K(AT-AT)	K(AT-D)	K(D-AT)	K(D-D)
1	1.6125	0.0443	0.0892	0.6314	0.3686	0.1802	0.8198
2	1.6479	0.0528	0.1439	0.6429	0.3571	0.2327	0.7673
3	2.3514	0.044	0.0845	0.6825	0.3175	0.3109	0.6891
4	2.3576	0.0352	0.1012	0.6543	0.3457	0.427	0.573
5	2.3822	0.0322	0.0721	0.7841	0.2159	0.2211	0.7789
6	2.7165	0.051	0.092	0.7078	0.2922	0.3778	0.6222
sLTP - 1 - Pre
Trajectory	V1 (μm/s)	D1 (μm2/s)	D2 (μm2/s)	K(AT-AT)	K(AT-D)	K(D-AT)	K(D-D)
1	1.923	0.0529	0.1312	0.7113	0.2887	0.2608	0.7392
2	1.9743	0.0383	0.1033	0.6349	0.3651	0.1811	0.8189
3	2.1693	0.0199	0.0982	0.6791	0.3209	0.3724	0.6276
4	2.2683	0.0382	0.1093	0.6875	0.3125	0.3228	0.6772
5	2.2746	0.0388	0.0885	0.6709	0.3291	0.4512	0.5488
6	2.3804	0.0498	0.0936	0.7133	0.2867	0.3859	0.6141
7	2.5481	0.0201	0.0609	0.8078	0.1922	0.2778	0.7222
sLTP - 1 - Post
Trajectory	V1 (μm/s)	D1 (μm2/s)	D2 (μm2/s)	K(AT-AT)	K(AT-D)	K(D-AT)	K(D-D)
1	1.188	0.0271	0.0633	0.8087	0.1913	0	1
2	1.8285	0.0331	0.0763	0.8635	0.1365	0	1
3	1.6129	0.0521	0.0521	0.5978	0.4022	0.1218	0.8782
4	1.7062	0.0289	0.074	0.4323	0.5677	0	1
5	1.5998	0.0498	0.0499	0.664	0.336	0.2838	0.7162
6	2.4409	0.019	0.0535	0.926	0.074	0	1
sLTP - 2+3 - Pre
Trajectory	V1 (μm/s)	D1 (μm2/s)	D2 (μm2/s)	K(AT-AT)	K(AT-D)	K(D-AT)	K(D-D)
1	1.6706	0.0269	0.0867	0.6978	0.3022	0.2706	0.7294
2	1.8027	0.0196	0.0735	0.7059	0.2941	0.2871	0.7129
3	1.8345	0.041	0.0873	0.6882	0.3118	0.2882	0.7118
4	2.1019	0.0339	0.1131	0.614	0.386	0.4175	0.5825
5	2.1633	0.0384	0.0935	0.7214	0.2786	0.3657	0.6343
6	2.2653	0.054	0.1037	0.8416	0.1584	0.1867	0.8133
7	3.913	0.0325	0.1108	0.7694	0.2306	0.4876	0.5124
sLTP - 2+3 - Post
Trajectory	V1 (μm/s)	D1 (μm2/s)	D2 (μm2/s)	K(AT-AT)	K(AT-D)	K(D-AT)	K(D-D)
1	1.3107	0.0318	0.0103	0.7812	0.2188	0.1674	0.8326
2	1.5962	0.0329	0.1071	0.6722	0.3278	0.3512	0.6488
3	2.0148	0.043	0.1176	0.5107	0.4893	0.401	0.599
4	2.2964	0.0338	0.0698	0.6928	0.3072	0.2585	0.7415
5	2.3435	0.0237	0.1232	0.7155	0.2845	0.2693	0.7307
6	2.7285	0.0415	0.0977	0.7658	0.2342	0.0342	0.9658
