# Supplementary material for: Plasticity-induced actin polymerization in the dendritic shaft regulates intracellular AMPA receptor trafficking
Source: eLife. 2024 Aug 15;13:e80622. doi: 10.7554/eLife.80622 (PMC11326776; doi:10.7554/eLife.80622)
Supplement: Figure 2—source data 1. [file elife-80622-fig2-data1.xlsx]

## Sheet: Figure 2
Figure 2-source data 1 - related to Figure 2C - sLTP - Fraction of active transport GluA1-HT vesicles in each zone								Figure 2-source data 2 - related to Figure 2D - histograms - diffusion coefficient (D, μm2/s) for GluA1-HT vesicles
	Zone 1		Zone 2		Zone 3			Trajectory	sLTP 1	sLTP 2+3
Experiment	Pre	Post	Pre	Post	Pre	Post		1	0.2137	0.3543
1	0.4	0	0.38	0.33	0.38	0.2		2	0.1849	0.2611
2	0.29	0	0.29	0.25	0.33	0.4		3	0.1734	0.2549
3	0.43	0	0.5	0.33	0.38	0.4		4	0.1664	0.2514
4	0.5	0.2	0.4	0.5	0.43	0.4		5	0.155	0.2168
5	0.33	0	0.4	0.25	0.43	0.5		6	0.1484	0.1838
6	0.43	0	0.43	0.4	0.4	0.25		7	0.1387	0.1727
7	0.4	0	0.5	0.5	0.4	0.33		8	0.1264	0.1712
8	0.38	0.25	0.36	0.6	0.33	0.4		9	0.125	0.1697
9	0.33	0.14	0.29	0.5	0.43	0.33		10	0.1241	0.1685
								11	0.1194	0.167
								12	0.1132	0.1608
								13	0.1115	0.1554
								14	0.1104	0.1541
								15	0.1068	0.151
								16	0.1022	0.1484
								17	0.0988	0.1471
								18	0.0945	0.1454
								19	0.0937	0.1406
								20	0.0932	0.1351
								21	0.0898	0.1324
								22	0.0873	0.126
								23	0.0853	0.1258
								24	0.0837	0.1236
								25	0.0829	0.1219
								26	0.0804	0.1207
								27	0.0792	0.1185
								28	0.0773	0.1142
								29	0.0771	0.1141
								30	0.077	0.1096
								31	0.0761	0.1077
								32	0.0753	0.1022
								33	0.0698	0.1018
								34	0.069	0.0962
								35	0.0672	0.0916
								36	0.0665	0.0911
								37	0.0661	0.0888
								38	0.0656	0.0846
								39	0.065	0.082
								40	0.0632	0.0802
								41	0.0614	0.0774
								42	0.0603	0.0745
								43	0.0575	0.0738
								44	0.0566	0.0721
								45	0.0561	0.0687
								46	0.0556	0.0658
								47	0.0538	0.0641
								48	0.0533	0.0633
								49	0.0528	0.0592
								50	0.0477	0.0574
								51	0.0469	0.0563
								52	0.0462	0.0511
								53	0.0451	0.0478
								54	0.0446	0.0477
								55	0.0425	0.0464
								56	0.0397	0.0457
								57	0.0387	0.0394
								58	0.037	0.0357
								59	0.0347	0.0235
								60	0.0332	0.0218
								61	0.0325
								62	0.0309
								63	0.0275
								64	0.024
								65	0.0217
								66	0.02
