# Supplementary material for: Plasticity-induced actin polymerization in the dendritic shaft regulates intracellular AMPA receptor trafficking
Source: eLife. 2024 Aug 15;13:e80622. doi: 10.7554/eLife.80622 (PMC11326776; doi:10.7554/eLife.80622)
Supplement: Figure 3—figure supplement 2—source data 1. [file elife-80622-fig3-figsupp2-data1.xlsx]

## Sheet: Figure 3-figure supplement 2
Figure 3-figure supplement 2-source data 1 - related to Figure 3-figure supplement 2C - Phalloidin MFI after cLTP
	Phlloidin MFI (AU)
	Mean	Std dev	Experiments
Control	16.5	3.34	5
cLTP	83.1	27.16	5
cLTP+LatA	5.75	4.04	5
