# Supplementary material for: Plasticity-induced actin polymerization in the dendritic shaft regulates intracellular AMPA receptor trafficking
Source: eLife. 2024 Aug 15;13:e80622. doi: 10.7554/eLife.80622 (PMC11326776; doi:10.7554/eLife.80622)
Supplement: Figure 3—figure supplement 3—source data 1. [file elife-80622-fig3-figsupp3-data1.xlsx]

## Sheet: Figure 3-figure supplement 3
Figure 3-figure supplement 3-source data 1 - related to Figure 3-figure supplement 3A - Length of actin increase after sLTP																			Figure 3-figure supplement 3-source data 4 - related to Figure 3-figure supplement 3D - histogram - diffusion coefficient (D, μm2/s) for GluA1-HT vesicles
Experiment	Length (μm)																		Trajectory	sLTP IN	No MNI IN
1	25.74																		1	0.2088	0.3673
2	20.82																		2	0.1688	0.2845
3	22.56																		3	0.157	0.2589
4	57.85																		4	0.149	0.2541
5	20.68																		5	0.1469	0.243
6	34.93																		6	0.1427	0.2362
7	27.88																		7	0.1393	0.2306
8	31.73																		8	0.1365	0.2058
9	30.44																		9	0.128	0.1894
																			10	0.1263	0.1788
																			11	0.119	0.1647
Figure 3-figure supplement 3-source data 2 - related to Figure 3-figure supplement 3B - Tractin MFI after sLTP in the presence of LatA or absence of MNI																			12	0.1177	0.1585
	Tractin MFI																		13	0.1148	0.1544
	sLTP+LatA		No MNI																14	0.113	0.1463
Experiment	Pre	Post	Pre	Post															15	0.1116	0.1432
1	54.61	52.42	132.49	133.92															16	0.1084	0.137
2	44.89	49.31	83.85	82.75															17	0.105	0.1309
3	128.48	125.52	48.34	51.21															18	0.1017	0.1286
4	134.31	139.32	134.73	128.63															19	0.0988	0.1271
5	117.05	123.38	70.3	69.05															20	0.0973	0.1263
6	96.28	98.27	113.08	108.33															21	0.0939	0.1257
7	102.02	98.24																	22	0.0888	0.1233
																			23	0.0884	0.1222
																			24	0.0861	0.1164
Figure 3-figure supplement 3-source data 3 - related to Figure 3-figure supplement 3C - GluA1-HT vesicles exhibiting active transport inside and outside the the area of tractin increase after sLTP in the absence of MNI																			25	0.0848	0.1141
	No MNI																		26	0.0833	0.1121
	IN		OUT																27	0.0794	0.1096
Experiment	Pre	Post	Pre	Post															28	0.0784	0.1066
1	0.33	0.4	0.43	0.43															29	0.0756	0.1037
2	0.5	0.5	0.29	0.5															30	0.0747	0.0993
3	0.43	0.5	0.5	0.2															31	0.0722	0.0984
4	0.25	0.33	0.5	0.25															32	0.0714	0.0965
5	0.5	0.6	0.29	0.6															33	0.0691	0.0924
6	0.43	0.25	0.38	0.43															34	0.0684	0.09
																			35	0.066	0.0873
																			36	0.064	0.086
Figure 3-figure supplement 3-source data 5 - related to Figure 3-figure supplement 3E - adjusted GluA1-HT vesicle counts																			37	0.0613	0.0858
	Vesicle counts																		38	0.0596	0.0848
	Pre			Post															39	0.0581	0.0808
	Average	SD	Experiments	Average	SD	Experiments													40	0.0564	0.0774
No MNI IN	6	1.67	6	6.23	0.98	6													41	0.0544	0.0755
No MNIOUT	8.33	1.37	6	7.94	1.49	6													42	0.0525	0.0582
																			43	0.0524	0.0579
																			44	0.0514	0.0564
																			45	0.0488	0.0536
																			46	0.0478	0.0512
																			47	0.0468	0.0462
																			48	0.0431	0.039
																			49	0.0418	0.037
																			50	0.04	0.0344
																			51	0.0389	0.0252
																			52	0.0375
																			53	0.0356
																			54	0.0337
																			55	0.0328
																			56	0.0282
																			57	0.026
																			58	0.02412
																			59	0.0225
