# Supplementary material for: Plasticity-induced actin polymerization in the dendritic shaft regulates intracellular AMPA receptor trafficking
Source: eLife. 2024 Aug 15;13:e80622. doi: 10.7554/eLife.80622 (PMC11326776; doi:10.7554/eLife.80622)
Supplement: Figure 3—figure supplement 4—source data 1. [file elife-80622-fig3-figsupp4-data1.xlsx]

## Sheet: Figure 3-figure supplement 4
Figure 3-figure supplement 4-source data 1- related to Figure 3-figure supplement 4 - state-switching probabilities for two-state GluA1-HT vesicles after sLTP
Actin - IN - Pre
Trajectory	V1 (μm/s)	D1 (μm2/s)	D2 (μm2/s)	K(AT-AT)	K(AT-D)	K(D-AT)	K(D-D)
1	1.8235	0.0332	0.0927	0.721	0.279	0.1983	0.8017
2	2.0421	0.0474	0.1066	0.6918	0.3082	0.4017	0.5983
3	2.3585	0.0362	0.1263	0.6918	0.3082	0.2911	0.7089
4	2.4018	0.0512	0.1343	0.7602	0.2398	0.319	0.681
5	2.7345	0.028	0.1027	0.9134	0.0866	0.1396	0.8604
6	3.4303	0.0382	0.0885	0.8018	0.1982	0.2902	0.7098
Actin - IN - Post
Trajectory	V1 (μm/s)	D1 (μm2/s)	D2 (μm2/s)	K(AT-AT)	K(AT-D)	K(D-AT)	K(D-D)
1	1.332	0.0283	0.0655	0.6009	0.3991	0.0008	0.9992
2	1.3666	0.0237	0.0514	0.9289	0.0711	0	1
3	1.5348	0.041	0.0873	0.792	0.208	0.0791	0.9209
4	2.1296	0.0143	0.059	0.4519	0.5481	0	1
5	2.3914	0.0506	0.0745	0.6711	0.3289	0.1181	0.8819
Actin - OUT - Pre
Trajectory	V1 (μm/s)	D1 (μm2/s)	D2 (μm2/s)	K(AT-AT)	K(AT-D)	K(D-AT)	K(D-D)
1	1.8966	0.0427	0.082	0.6482	0.3518	0.2209	0.7791
2	1.9053	0.0399	0.12	0.692	0.308	0.1781	0.8219
3	1.9658	0.0447	0.097	0.7322	0.2678	0.1702	0.8298
4	2.01	0.0537	0.1242	0.7811	0.2189	0.3002	0.6998
5	2.1587	0.0323	0.0685	0.7218	0.2782	0.2702	0.7298
6	2.1621	0.0276	0.1092	0.8018	0.1982	0.2859	0.7141
7	2.6079	0.0286	0.0675	0.8818	0.1182	0.4858	0.5142
8	3.0501	0.0524	0.1431	0.8913	0.1087	0.4008	0.5992
Actin - OUT - Post
Trajectory	V1 (μm/s)	D1 (μm2/s)	D2 (μm2/s)	K(AT-AT)	K(AT-D)	K(D-AT)	K(D-D)
1	1.3483	0.0472	0.0783	0.4598	0.5402	0.1108	0.8892
2	1.6476	0.015	0.0655	0.6928	0.3072	0.1897	0.8103
3	1.8158	0.0375	0.0917	0.8291	0.1709	0.2187	0.7813
4	2.0754	0.0348	0.1094	0.5939	0.4061	0.4009	0.5991
5	2.4933	0.0596	0.1122	0.9098	0.0902	0.2188	0.7812
6	3.4858	0.0262	0.0877	0.6829	0.3171	0.2382	0.7618
LatA - IN - Pre
Trajectory	V1 (μm/s)	D1 (μm2/s)	D2 (μm2/s)	K(AT-AT)	K(AT-D)	K(D-AT)	K(D-D)
1	1.5742	0.0267	0.1038	0.732	0.268	0.2081	0.7919
2	1.7256	0.021	0.096	0.7532	0.2468	0.2702	0.7298
3	2.1218	0.0415	0.0992	0.6713	0.3287	0.4008	0.5992
4	2.2062	0.059	0.1339	0.7919	0.2081	0.1908	0.8092
5	2.5292	0.0569	0.1491	0.6418	0.3582	0.3909	0.6091
6	2.6601	0.0337	0.0809	0.7819	0.2181	0.0998	0.9002
7	3.4772	0.0437	0.1008	0.822	0.178	0.2807	0.7193
LatA - IN - Post
Trajectory	V1 (μm/s)	D1 (μm2/s)	D2 (μm2/s)	K(AT-AT)	K(AT-D)	K(D-AT)	K(D-D)
1	1.53423	0.04368	0.10161	0.681237	0.318763	0.329608	0.670392
2	1.54681	0.03854	0.12285	0.791294	0.208706	0.182858	0.817142
3	2.34079	0.05152	0.13276	0.742318	0.257682	0.230872	0.769128
4	2.90577	0.04792	0.09344	0.652483	0.347517	0.408176	0.591824
5	3.27255	0.023	0.08755	0.691924	0.308076	0.316072	0.683928
