# Supplementary material for: Plasticity-induced actin polymerization in the dendritic shaft regulates intracellular AMPA receptor trafficking
Source: eLife. 2024 Aug 15;13:e80622. doi: 10.7554/eLife.80622 (PMC11326776; doi:10.7554/eLife.80622)
Supplement: Figure 3—figure supplement 5—source data 1. [file elife-80622-fig3-figsupp5-data1.xlsx]

## Sheet: Figure 3-figure supplement 5
Figure 3-figure supplement 5-source data 1 - related to Figure 3-figure supplement 5A - fraction of GluA1-HT vesicles exhibiting active transport after cLTP in the presence of LatA															Figure 3-figure supplement 5-source data 2 - related to Figure 3-figure supplement 5B - histogram - diffusion coefficient (D, μm2/s) for GluA1-HT vesicles
	cLTP+LatA														Trajectory	Control	cLTP	cLTP+LatA
Experiment	Active transport														1	0.4315	0.2098	0.4593
1	0.22														2	0.3766	0.2087	0.4167
2	0.19														3	0.3634	0.1972	0.3784
3	0.27														4	0.3505	0.191	0.3782
4	0.35														5	0.3442	0.1818	0.3479
5	0.26														6	0.3411	0.1799	0.3476
6	0.26														7	0.3404	0.1766	0.336
7	0.21														8	0.3131	0.1688	0.3292
8	0.3														9	0.3121	0.1684	0.3278
9	0.23														10	0.302	0.1656	0.3276
															11	0.2965	0.164	0.3243
															12	0.2925	0.1637	0.3022
															13	0.2915	0.1614	0.3013
															14	0.2815	0.1614	0.2949
															15	0.2696	0.1612	0.277
															16	0.2687	0.1582	0.2767
															17	0.2566	0.157	0.2745
															18	0.2457	0.1521	0.2718
															19	0.2416	0.1514	0.2621
															20	0.241	0.15	0.2615
															21	0.2341	0.1491	0.2529
															22	0.2196	0.1483	0.2523
															23	0.2184	0.1468	0.2501
															24	0.2134	0.1445	0.25
															25	0.2065	0.1434	0.25
															26	0.195	0.1427	0.2481
															27	0.1918	0.1399	0.2411
															28	0.1895	0.1392	0.2391
															29	0.1892	0.1365	0.239
															30	0.1872	0.1353	0.234
															31	0.187	0.1337	0.2278
															32	0.1838	0.1336	0.2272
															33	0.1837	0.1314	0.227
															34	0.1829	0.1313	0.2233
															35	0.1826	0.1301	0.215
															36	0.1813	0.1295	0.2089
															37	0.1747	0.1292	0.2071
															38	0.1744	0.1287	0.2068
															39	0.1737	0.1281	0.204
															40	0.1681	0.1279	0.2002
															41	0.1654	0.1279	0.1947
															42	0.161	0.1276	0.1945
															43	0.1578	0.1263	0.1927
															44	0.1556	0.1226	0.1906
															45	0.1549	0.1199	0.1905
															46	0.1539	0.1198	0.1784
															47	0.1527	0.1191	0.1773
															48	0.1524	0.1181	0.1771
															49	0.1518	0.1179	0.1743
															50	0.1515	0.1177	0.1658
															51	0.1513	0.1177	0.1638
															52	0.1488	0.1174	0.1631
															53	0.1463	0.1165	0.163
															54	0.1457	0.1163	0.163
															55	0.1453	0.1157	0.1616
															56	0.1448	0.1149	0.1608
															57	0.1438	0.1148	0.1607
															58	0.1432	0.1144	0.1603
															59	0.1423	0.1142	0.1546
															60	0.1415	0.1141	0.1534
															61	0.1407	0.1131	0.1509
															62	0.1398	0.1129	0.1504
															63	0.138	0.1129	0.15
															64	0.1361	0.1116	0.1491
															65	0.1359	0.1103	0.1482
															66	0.1355	0.1103	0.148
															67	0.135	0.1098	0.1457
															68	0.1323	0.1097	0.1417
															69	0.132	0.1096	0.1415
															70	0.1317	0.1092	0.1411
															71	0.1314	0.1083	0.141
															72	0.1309	0.1054	0.14
															73	0.1303	0.105	0.1395
															74	0.1298	0.1033	0.1379
															75	0.1295	0.1028	0.1352
															76	0.1292	0.1026	0.1347
															77	0.129	0.1018	0.1341
															78	0.1236	0.1017	0.1339
															79	0.1234	0.1017	0.1337
															80	0.1233	0.0993	0.1324
															81	0.1216	0.0989	0.1318
															82	0.1213	0.0987	0.1307
															83	0.1213	0.0986	0.1291
															84	0.1209	0.0983	0.1275
															85	0.1201	0.0977	0.1265
															86	0.1197	0.0972	0.1262
															87	0.1194	0.0971	0.1254
															88	0.118	0.0971	0.1222
															89	0.117	0.097	0.1217
															90	0.1168	0.097	0.1214
															91	0.1157	0.0968	0.1207
															92	0.1157	0.0968	0.1199
															93	0.1148	0.0966	0.1192
															94	0.1138	0.0953	0.1189
															95	0.1134	0.094	0.1179
															96	0.1132	0.094	0.1175
															97	0.1125	0.0939	0.1175
															98	0.1106	0.0938	0.1171
															99	0.11	0.0902	0.117
															100	0.1097	0.0902	0.1163
															101	0.1095	0.09	0.1161
															102	0.1085	0.0899	0.116
															103	0.1082	0.0895	0.1158
															104	0.1082	0.0891	0.1152
															105	0.1081	0.0891	0.114
															106	0.1074	0.0888	0.114
															107	0.1071	0.0887	0.1139
															108	0.1048	0.0887	0.1132
															109	0.1047	0.0886	0.113
															110	0.1026	0.0886	0.1129
															111	0.102	0.0884	0.1125
															112	0.102	0.0883	0.1124
															113	0.0995	0.0882	0.1124
															114	0.0972	0.0881	0.1111
															115	0.0951	0.0877	0.1108
															116	0.095	0.0874	0.1094
															117	0.0943	0.0873	0.1092
															118	0.0935	0.0872	0.1083
															119	0.0935	0.0864	0.108
															120	0.0926	0.0861	0.108
															121	0.0915	0.0858	0.1076
															122	0.0914	0.0857	0.1069
															123	0.0908	0.0856	0.1064
															124	0.0903	0.0856	0.1059
															125	0.0902	0.0848	0.1057
															126	0.0895	0.0847	0.105
															127	0.0893	0.0845	0.105
															128	0.0892	0.0842	0.1046
															129	0.0886	0.0834	0.1041
															130	0.088	0.0823	0.1038
															131	0.0861	0.0823	0.1036
															132	0.0857	0.0822	0.1035
															133	0.084	0.0822	0.1032
															134	0.0839	0.0821	0.1027
															135	0.0833	0.0819	0.1024
															136	0.0833	0.0805	0.1018
															137	0.0832	0.0803	0.1014
															138	0.0832	0.0802	0.101
															139	0.0824	0.0796	0.1009
															140	0.0823	0.0793	0.1008
															141	0.0816	0.0787	0.1006
															142	0.0811	0.0786	0.0996
															143	0.081	0.0784	0.0993
															144	0.0798	0.0782	0.0992
															145	0.0793	0.078	0.0991
															146	0.0782	0.0779	0.0988
															147	0.0754	0.0776	0.0981
															148	0.0747	0.0767	0.0978
															149	0.0744	0.0761	0.0977
															150	0.0737	0.0757	0.0976
															151	0.0733	0.0754	0.0972
															152	0.073	0.0752	0.0969
															153	0.0721	0.0746	0.0962
															154	0.072	0.0744	0.096
															155	0.0717	0.0742	0.0953
															156	0.0715	0.074	0.0952
															157	0.0701	0.0737	0.0948
															158	0.07	0.0724	0.0946
															159	0.0691	0.0723	0.0946
															160	0.0689	0.0722	0.0945
															161	0.0688	0.0722	0.0945
															162	0.0679	0.0721	0.0944
															163	0.0678	0.072	0.0944
															164	0.0677	0.072	0.0937
															165	0.0675	0.0717	0.0936
															166	0.0669	0.0714	0.0935
															167	0.0661	0.0711	0.0933
															168	0.0657	0.0711	0.0933
															169	0.0655	0.0711	0.0929
															170	0.0648	0.0703	0.0928
															171	0.0644	0.0691	0.0918
															172	0.0641	0.069	0.0914
															173	0.0633	0.0688	0.0911
															174	0.063	0.0687	0.0909
															175	0.0625	0.0684	0.0909
															176	0.061	0.0683	0.0907
															177	0.0607	0.0677	0.0894
															178	0.0607	0.0675	0.0893
															179	0.0606	0.0665	0.0885
															180	0.0605	0.0665	0.0883
															181	0.0598	0.0661	0.0879
															182	0.0591	0.0659	0.0875
															183	0.0579	0.0656	0.0873
															184	0.0575	0.0655	0.087
															185	0.0571	0.0654	0.0866
															186	0.0568	0.0654	0.0864
															187	0.0566	0.0654	0.0863
															188	0.055	0.0649	0.0861
															189	0.055	0.0648	0.0861
															190	0.054	0.0645	0.0855
															191	0.0526	0.0644	0.0853
															192	0.0521	0.0642	0.085
															193	0.0517	0.064	0.0849
															194	0.0516	0.0639	0.0848
															195	0.0515	0.0637	0.0845
															196	0.0511	0.0626	0.0843
															197	0.051	0.0626	0.0841
															198	0.0509	0.0622	0.084
															199	0.0502	0.0621	0.084
															200	0.049	0.0621	0.0839
															201	0.0482	0.0618	0.0835
															202	0.0449	0.0615	0.0833
															203	0.0431	0.0614	0.083
															204	0.0425	0.0613	0.0829
															205	0.0424	0.0611	0.0824
															206	0.0423	0.061	0.0812
															207	0.0422	0.0609	0.0811
															208	0.0418	0.0606	0.0808
															209	0.0417	0.0606	0.0804
															210	0.0415	0.0602	0.0803
															211	0.0403	0.0602	0.0801
															212	0.0403	0.06	0.0793
															213	0.0399	0.06	0.0793
															214	0.0392	0.0596	0.0793
															215	0.0384	0.0592	0.0786
															216	0.0381	0.0591	0.0777
															217	0.0369	0.0583	0.0774
															218	0.0364	0.0582	0.0773
															219	0.0358	0.0572	0.0768
															220	0.0338	0.057	0.0761
															221	0.0336	0.0568	0.0755
															222	0.0334	0.0564	0.075
															223	0.0333	0.0563	0.0745
															224	0.0327	0.0563	0.0744
															225	0.0317	0.0558	0.0743
															226	0.0315	0.0553	0.0742
															227	0.0246	0.0553	0.0742
															228		0.055	0.0742
															229		0.0544	0.0735
															230		0.0542	0.0733
															231		0.0537	0.0732
															232		0.0535	0.0731
															233		0.0532	0.0729
															234		0.0529	0.0726
															235		0.0525	0.0723
															236		0.0524	0.071
															237		0.0522	0.0709
															238		0.0521	0.0708
															239		0.0516	0.0707
															240		0.0513	0.0705
															241		0.0513	0.0704
															242		0.0513	0.0702
															243		0.0511	0.0693
															244		0.051	0.0692
															245		0.0507	0.0689
															246		0.0506	0.0687
															247		0.0506	0.0686
															248		0.0497	0.0685
															249		0.0494	0.0682
															250		0.0492	0.0679
															251		0.0491	0.0674
															252		0.0488	0.0665
															253		0.0487	0.0665
															254		0.0485	0.066
															255		0.0483	0.0657
															256		0.048	0.0656
															257		0.048	0.0654
															258		0.0479	0.0634
															259		0.0478	0.0633
															260		0.0473	0.0629
															261		0.0472	0.0628
															262		0.0471	0.0626
															263		0.047	0.0619
															264		0.047	0.0615
															265		0.0468	0.0611
															266		0.0463	0.0601
															267		0.0462	0.0595
															268		0.0461	0.0579
															269		0.0459	0.0578
															270		0.0457	0.0577
															271		0.0454	0.057
															272		0.0435	0.0566
															273		0.0432	0.0566
															274		0.0427	0.0542
															275		0.0427	0.054
															276		0.0426	0.0534
															277		0.0422	0.0533
															278		0.0419	0.0529
															279		0.0418	0.0525
															280		0.0416	0.0511
															281		0.0414	0.0507
															282		0.0414	0.0502
															283		0.0413	0.0498
															284		0.0412	0.0494
															285		0.0411	0.0492
															286		0.0411	0.0486
															287		0.0407	0.048
															288		0.0407	0.0459
															289		0.0407	0.0458
															290		0.0401	0.0456
															291		0.04	0.0454
															292		0.0399	0.0454
															293		0.0398	0.0448
															294		0.0396	0.0448
															295		0.0395	0.0441
															296		0.0393	0.0425
															297		0.0392	0.0425
															298		0.0387	0.0417
															299		0.0386	0.0415
															300		0.0383	0.041
															301		0.038	0.0382
															302		0.0379	0.0361
															303		0.0375	0.0347
															304		0.0371	0.0287
															305		0.0366	0.0229
															306		0.0365	0.022
															307		0.0364
															308		0.0362
															309		0.0359
															310		0.0358
															311		0.0356
															312		0.0353
															313		0.035
															314		0.0348
															315		0.0347
															316		0.0346
															317		0.0344
															318		0.0341
															319		0.0339
															320		0.0338
															321		0.0337
															322		0.0335
															323		0.0334
															324		0.0333
															325		0.0331
															326		0.0328
															327		0.0326
															328		0.032
															329		0.0319
															330		0.0316
															331		0.0309
															332		0.0307
															333		0.0301
															334		0.0297
															335		0.0296
															336		0.029
															337		0.0289
															338		0.0286
															339		0.0284
															340		0.0282
															341		0.0276
															342		0.0274
															343		0.0273
															344		0.027
															345		0.0269
															346		0.0264
															347		0.0259
															348		0.0253
															349		0.0249
															350		0.0243
															351		0.0242
															352		0.024
															353		0.023
															354		0.0229
															355		0.0228
															356		0.0225
															357		0.0224
															358		0.022
															359		0.0219
															360		0.0201
