# Supplementary material for: Plasticity-induced actin polymerization in the dendritic shaft regulates intracellular AMPA receptor trafficking
Source: eLife. 2024 Aug 15;13:e80622. doi: 10.7554/eLife.80622 (PMC11326776; doi:10.7554/eLife.80622)
Supplement: Figure 3—figure supplement 6—source data 1. [file elife-80622-fig3-figsupp6-data1.xlsx]

## Sheet: Figure 3-figure supplement 6
Figure 3-figure supplement 6-source data 1 - related to Figure 3-figure supplement 6B - fraction of GluA1-HT vesicles exhibiting active transport after cLTP in the presence of myosin inhibition														Figure 3-figure supplement 6-source data 2 - related to Figure 3-figure supplement 6C and 6D- histograms - diffusion coefficients of GluA1-HT vesicles cLTP in the presence of myosin inhibition
	GluA1-HT vesicles exhibiting active transport													Trajectories	Control	Con Va DN	Con Vb DN	ConVIDN	Con MI	cLTP	cLTP Va DN	cLTP Vb DN	cLTP VI DN	cLTP MI	sLTP	sLTP MI
	Control			cLTP										1	0.4315	0.4259	0.4053	0.3742	0.2686	0.2098	0.2699	0.2495	0.2097	0.1688	0.2088	0.1892
	Average	Std dev	Experiments	Average	Std dev	Experiments								2	0.3766	0.3334	0.2914	0.3288	0.2187	0.2087	0.2016	0.208	0.1964	0.157	0.1688	0.1677
Control	0.37	0.08	12	0.13	0.05	14								3	0.3634	0.2632	0.2653	0.2725	0.1919	0.1972	0.1862	0.1906	0.1922	0.1468	0.157	0.1611
MyoVa-DN	0.4	0.09	3	0.11	0.1	3								4	0.3505	0.2511	0.2505	0.2494	0.1826	0.191	0.1772	0.1808	0.1863	0.1427	0.149	0.151
MyoVb-DN	0.32	0.07	3	0.05	0.06	3								5	0.3442	0.2504	0.2386	0.2477	0.1744	0.1818	0.1639	0.1689	0.1705	0.1365	0.1469	0.1497
MyoVI-DN	0.29	0.13	3	0.09	0.07	3								6	0.3411	0.2241	0.1937	0.2412	0.1654	0.1799	0.1514	0.1569	0.1611	0.1301	0.1427	0.1468
Myosin Inhibitors	0.3	0.05	9	0.09	0.07	9								7	0.3404	0.2138	0.1888	0.2175	0.1557	0.1766	0.1335	0.1408	0.1535	0.1287	0.1393	0.1393
														8	0.3131	0.2131	0.168	0.2103	0.1537	0.1688	0.1228	0.1364	0.1524	0.1279	0.1365	0.131
														9	0.3121	0.1796	0.1522	0.1577	0.1528	0.1684	0.1202	0.1282	0.1426	0.1226	0.128	0.128
Figure 3-figure supplement 6-source data 3 - related to Figure 3-figure supplement 6C - fraction of GluA1-HT vesicles exhibiting active transport after sLTP in the presence of myosin inhibition														10	0.302	0.1622	0.1518	0.1484	0.1457	0.1656	0.117	0.1207	0.1361	0.1191	0.1263	0.1263
	Active transport													11	0.2965	0.1534	0.1414	0.1445	0.1449	0.164	0.1163	0.1156	0.1285	0.1165	0.119	0.1223
	Average	SD	Experiments											12	0.2925	0.1521	0.1384	0.142	0.1423	0.1637	0.1121	0.1106	0.1246	0.1149	0.1177	0.1148
sLTP	0.08	0.09	9											13	0.2915	0.1408	0.1346	0.1415	0.1398	0.1614	0.1073	0.1042	0.1218	0.1129	0.1148	0.1138
sLTP+MI	0.13	0.15	6											14	0.2815	0.1379	0.1329	0.1334	0.1359	0.1614	0.1012	0.1003	0.1152	0.1096	0.113	0.1116
														15	0.2696	0.1329	0.1263	0.1307	0.1325	0.1612	0.0993	0.0978	0.1128	0.1083	0.1116	0.1098
														16	0.2687	0.1309	0.1196	0.1248	0.1318	0.1582	0.0975	0.0947	0.1102	0.1033	0.1084	0.1083
														17	0.2566	0.1269	0.119	0.1246	0.1299	0.157	0.0924	0.0888	0.1071	0.0993	0.105	0.1028
														18	0.2457	0.1248	0.1141	0.1187	0.1236	0.1521	0.0891	0.0863	0.1031	0.0986	0.1017	0.0987
														19	0.2416	0.1241	0.1033	0.1152	0.1216	0.1514	0.088	0.0815	0.101	0.0972	0.0988	0.0966
														20	0.241	0.1235	0.0981	0.1117	0.1208	0.15	0.0868	0.1408	0.1	0.097	0.0973	0.094
														21	0.2341	0.1234	0.0978	0.1066	0.1179	0.1491	0.086	0.0793	0.0928	0.0938	0.0939	0.0887
														22	0.2196	0.1208	0.0914	0.1012	0.1158	0.1483	0.0854	0.0779	0.09	0.09	0.0888	0.0869
														23	0.2184	0.1153	0.0897	0.0964	0.1156	0.1468	0.082	0.0771	0.0884	0.0893	0.0884	0.0847
														24	0.2134	0.1063	0.0895	0.0949	0.115	0.1445	0.0803	0.0746	0.0862	0.0887	0.0861	0.0833
														25	0.2065	0.098	0.0854	0.093	0.1136	0.1434	0.0783	0.0724	0.085	0.0881	0.0848	0.079
														26	0.195	0.0979	0.0819	0.0925	0.1133	0.1427	0.0762	0.0715	0.084	0.0873	0.0833	0.0784
														27	0.1918	0.0932	0.0805	0.0896	0.11	0.1399	0.075	0.0697	0.0813	0.086	0.0794	0.0782
														28	0.1895	0.0875	0.0758	0.0884	0.1095	0.1392	0.0739	0.0684	0.0804	0.0856	0.0784	0.0723
														29	0.1892	0.0833	0.0757	0.0877	0.109	0.1365	0.0734	0.0664	0.0802	0.0845	0.0756	0.0723
														30	0.1872	0.0824	0.0723	0.0848	0.1081	0.1353	0.0724	0.0654	0.0772	0.0823	0.0747	0.0714
														31	0.187	0.0816	0.0712	0.082	0.1048	0.1337	0.0714	0.0647	0.0758	0.0822	0.0722	0.0712
														32	0.1838	0.0799	0.0672	0.0807	0.1027	0.1336	0.0706	0.0615	0.0757	0.0821	0.0714	0.0683
														33	0.1837	0.079	0.0672	0.0804	0.102	0.1314	0.0703	0.0603	0.0743	0.0804	0.0691	0.064
														34	0.1829	0.0759	0.066	0.0774	0.0949	0.1313	0.0694	0.0592	0.074	0.0787	0.0684	0.0613
														35	0.1826	0.0742	0.0639	0.072	0.0935	0.1301	0.0681	0.0545	0.0736	0.0779	0.066	0.061
														36	0.1813	0.0699	0.0626	0.0704	0.0927	0.1295	0.0669	0.0512	0.0729	0.0768	0.064	0.0602
														37	0.1747	0.0686	0.062	0.0689	0.092	0.1292	0.0664	0.05	0.0721	0.0756	0.0613	0.0596
														38	0.1744	0.0671	0.0607	0.0633	0.0896	0.1287	0.064	0.0485	0.0695	0.0751	0.0596	0.0579
														39	0.1737	0.0669	0.0605	0.0602	0.0893	0.1281	0.0628	0.0475	0.0684	0.0722	0.0581	0.0544
														40	0.1681	0.065	0.0593	0.0547	0.0861	0.1279	0.061	0.046	0.0676	0.072	0.0564	0.0544
														41	0.1654	0.0618	0.0588	0.0542	0.0857	0.1279	0.0586	0.044	0.0673	0.071	0.0544	0.0543
														42	0.161	0.0601	0.0543	0.0534	0.0834	0.1276	0.0573	0.0424	0.0649	0.069	0.0525	0.0526
														43	0.1578	0.0589	0.0534	0.051	0.0832	0.1263	0.0556	0.0415	0.0639	0.0684	0.0524	0.0521
														44	0.1556	0.0546	0.0507	0.0458	0.0817	0.1226	0.0554	0.0397	0.0626	0.0665	0.0514	0.0488
														45	0.1549	0.0518	0.0496	0.0456	0.0811	0.1199	0.0547	0.0374	0.0611	0.0657	0.0488	0.0478
														46	0.1539	0.0512	0.0466	0.0453	0.0782	0.1198	0.0539	0.0371	0.0599	0.0654	0.0478	0.0432
														47	0.1527	0.0507	0.0432	0.0433	0.0754	0.1191	0.0528	0.0332	0.0582	0.0645	0.0468	0.0391
														48	0.1524	0.0505	0.0374	0.0396	0.0738	0.1181	0.0516	0.0318	0.0545	0.0639	0.0431	0.0383
														49	0.1518	0.0415	0.0367	0.0395	0.0733	0.1179	0.0508	0.0305	0.053	0.0626	0.0418	0.0382
														50	0.1515	0.0396	0.0352	0.0374	0.0719	0.1177	0.0488	0.0289	0.0515	0.0621	0.04	0.0375
														51	0.1513	0.0356	0.0321	0.0365	0.0715	0.1177	0.0462	0.0272	0.0507	0.0613	0.0389	0.0375
														52	0.1488	0.1297	0.0297	0.031	0.07	0.1174	0.0446	0.0252	0.0491	0.0609	0.0375	0.0328
														53	0.1463	0.1091	0.0273	0.0296	0.0689	0.1165	0.0408	0.0218	0.0484	0.0602	0.0356	0.0251
														54	0.1457	0.0786	0.0205	0.0233	0.0679	0.1163	0.0402	0.0207	0.0476	0.0596	0.0337	0.0225
														55	0.1453	0.0247		0.0214	0.0661	0.1157	0.0394		0.0466	0.0583	0.0328
														56	0.1448	0.0238			0.0649	0.1149	0.0392		0.0456	0.0563	0.0282
														57	0.1438	0.0432			0.0641	0.1148	0.0362		0.0443	0.055	0.026
														58	0.1432	0.0505			0.0631	0.1144	0.0357		0.0433	0.0535	0.0241
														59	0.1423				0.0607	0.1142	0.0347		0.0426	0.0522	0.0225
														60	0.1415				0.0605	0.1141	0.0334		0.041	0.0513
														61	0.1407				0.0591	0.1131	0.0323		0.0401	0.0507
														62	0.1398				0.0576	0.1129	0.0321		0.0378	0.0491
														63	0.138				0.0551	0.1129	0.031		0.0366	0.048
														64	0.1361				0.0549	0.1116	0.0308		0.0347	0.0469
														65	0.1359				0.0526	0.1103	0.0303		0.0342	0.0461
														66	0.1355				0.0516	0.1103	0.0295		0.033	0.0457
														67	0.135				0.0509	0.1098	0.0265		0.0308	0.0432
														68	0.1323				0.0501	0.1097	0.0258		0.0296	0.0414
														69	0.132				0.0449	0.1096	0.0258		0.0295	0.0411
														70	0.1317				0.0425	0.1092	0.0255		0.029	0.04
														71	0.1314				0.0423	0.1083	0.0226		0.0287	0.0393
														72	0.1309				0.0417	0.1054	0.022		0.0283	0.0371
														73	0.1303				0.0399	0.105			0.0275	0.0358
														74	0.1298				0.0369	0.1033			0.0266	0.0347
														75	0.1295				0.034	0.1028			0.0255	0.0338
														76	0.1292				0.0317	0.1026			0.0244	0.0331
														77	0.129					0.1018			0.0218	0.0316
														78	0.1236					0.1017			0.021	0.0301
														79	0.1234					0.1017				0.0286
														80	0.1233					0.0993				0.0272
														81	0.1216					0.0989				0.0242
														82	0.1213					0.0987				0.0219
														83	0.1213					0.0986
														84	0.1209					0.0983
														85	0.1201					0.0977
														86	0.1197					0.0972
														87	0.1194					0.0971
														88	0.118					0.0971
														89	0.117					0.097
														90	0.1168					0.097
														91	0.1157					0.0968
														92	0.1157					0.0968
														93	0.1148					0.0966
														94	0.1138					0.0953
														95	0.1134					0.094
														96	0.1132					0.094
														97	0.1125					0.0939
														98	0.1106					0.0938
														99	0.11					0.0902
														100	0.1097					0.0902
														101	0.1095					0.09
														102	0.1085					0.0899
														103	0.1082					0.0895
														104	0.1082					0.0891
														105	0.1081					0.0891
														106	0.1074					0.0888
														107	0.1071					0.0887
														108	0.1048					0.0887
														109	0.1047					0.0886
														110	0.1026					0.0886
														111	0.102					0.0884
														112	0.102					0.0883
														113	0.0995					0.0882
														114	0.0972					0.0881
														115	0.0951					0.0877
														116	0.095					0.0874
														117	0.0943					0.0873
														118	0.0935					0.0872
														119	0.0935					0.0864
														120	0.0926					0.0861
														121	0.0915					0.0858
														122	0.0914					0.0857
														123	0.0908					0.0856
														124	0.0903					0.0856
														125	0.0902					0.0848
														126	0.0895					0.0847
														127	0.0893					0.0845
														128	0.0892					0.0842
														129	0.0886					0.0834
														130	0.088					0.0823
														131	0.0861					0.0823
														132	0.0857					0.0822
														133	0.084					0.0822
														134	0.0839					0.0821
														135	0.0833					0.0819
														136	0.0833					0.0805
														137	0.0832					0.0803
														138	0.0832					0.0802
														139	0.0824					0.0796
														140	0.0823					0.0793
														141	0.0816					0.0787
														142	0.0811					0.0786
														143	0.081					0.0784
														144	0.0798					0.0782
														145	0.0793					0.078
														146	0.0782					0.0779
														147	0.0754					0.0776
														148	0.0747					0.0767
														149	0.0744					0.0761
														150	0.0737					0.0757
														151	0.0733					0.0754
														152	0.073					0.0752
														153	0.0721					0.0746
														154	0.072					0.0744
														155	0.0717					0.0742
														156	0.0715					0.074
														157	0.0701					0.0737
														158	0.07					0.0724
														159	0.0691					0.0723
														160	0.0689					0.0722
														161	0.0688					0.0722
														162	0.0679					0.0721
														163	0.0678					0.072
														164	0.0677					0.072
														165	0.0675					0.0717
														166	0.0669					0.0714
														167	0.0661					0.0711
														168	0.0657					0.0711
														169	0.0655					0.0711
														170	0.0648					0.0703
														171	0.0644					0.0691
														172	0.0641					0.069
														173	0.0633					0.0688
														174	0.063					0.0687
														175	0.0625					0.0684
														176	0.061					0.0683
														177	0.0607					0.0677
														178	0.0607					0.0675
														179	0.0606					0.0665
														180	0.0605					0.0665
														181	0.0598					0.0661
														182	0.0591					0.0659
														183	0.0579					0.0656
														184	0.0575					0.0655
														185	0.0571					0.0654
														186	0.0568					0.0654
														187	0.0566					0.0654
														188	0.055					0.0649
														189	0.055					0.0648
														190	0.054					0.0645
														191	0.0526					0.0644
														192	0.0521					0.0642
														193	0.0517					0.064
														194	0.0516					0.0639
														195	0.0515					0.0637
														196	0.0511					0.0626
														197	0.051					0.0626
														198	0.0509					0.0622
														199	0.0502					0.0621
														200	0.049					0.0621
														201	0.0482					0.0618
														202	0.0449					0.0615
														203	0.0431					0.0614
														204	0.0425					0.0613
														205	0.0424					0.0611
														206	0.0423					0.061
														207	0.0422					0.0609
														208	0.0418					0.0606
														209	0.0417					0.0606
														210	0.0415					0.0602
														211	0.0403					0.0602
														212	0.0403					0.06
														213	0.0399					0.06
														214	0.0392					0.0596
														215	0.0384					0.0592
														216	0.0381					0.0591
														217	0.0369					0.0583
														218	0.0364					0.0582
														219	0.0358					0.0572
														220	0.0338					0.057
														221	0.0336					0.0568
														222	0.0334					0.0564
														223	0.0333					0.0563
														224	0.0327					0.0563
														225	0.0317					0.0558
														226	0.0315					0.0553
														227	0.0246					0.0553
														228						0.055
														229						0.0544
														230						0.0542
														231						0.0537
														232						0.0535
														233						0.0532
														234						0.0529
														235						0.0525
														236						0.0524
														237						0.0522
														238						0.0521
														239						0.0516
														240						0.0513
														241						0.0513
														242						0.0513
														243						0.0511
														244						0.051
														245						0.0507
														246						0.0506
														247						0.0506
														248						0.0497
														249						0.0494
														250						0.0492
														251						0.0491
														252						0.0488
														253						0.0487
														254						0.0485
														255						0.0483
														256						0.048
														257						0.048
														258						0.0479
														259						0.0478
														260						0.0473
														261						0.0472
														262						0.0471
														263						0.047
														264						0.047
														265						0.0468
														266						0.0463
														267						0.0462
														268						0.0461
														269						0.0459
														270						0.0457
														271						0.0454
														272						0.0435
														273						0.0432
														274						0.0427
														275						0.0427
														276						0.0426
														277						0.0422
														278						0.0419
														279						0.0418
														280						0.0416
														281						0.0414
														282						0.0414
														283						0.0413
														284						0.0412
														285						0.0411
														286						0.0411
														287						0.0407
														288						0.0407
														289						0.0407
														290						0.0401
														291						0.04
														292						0.0399
														293						0.0398
														294						0.0396
														295						0.0395
														296						0.0393
														297						0.0392
														298						0.0387
														299						0.0386
														300						0.0383
														301						0.038
														302						0.0379
														303						0.0375
														304						0.0371
														305						0.0366
														306						0.0365
														307						0.0364
														308						0.0362
														309						0.0359
														310						0.0358
														311						0.0356
														312						0.0353
														313						0.035
														314						0.0348
														315						0.0347
														316						0.0346
														317						0.0344
														318						0.0341
														319						0.0339
														320						0.0338
														321						0.0337
														322						0.0335
														323						0.0334
														324						0.0333
														325						0.0331
														326						0.0328
														327						0.0326
														328						0.032
														329						0.0319
														330						0.0316
														331						0.0309
														332						0.0307
														333						0.0301
														334						0.0297
														335						0.0296
														336						0.029
														337						0.0289
														338						0.0286
														339						0.0284
														340						0.0282
														341						0.0276
														342						0.0274
														343						0.0273
														344						0.027
														345						0.0269
														346						0.0264
														347						0.0259
														348						0.0253
														349						0.0249
														350						0.0243
														351						0.0242
														352						0.024
														353						0.023
														354						0.0229
														355						0.0228
														356						0.0225
														357						0.0224
														358						0.022
														359						0.0219
														360						0.0201
