# Supplementary material for: Plasticity-induced actin polymerization in the dendritic shaft regulates intracellular AMPA receptor trafficking
Source: eLife. 2024 Aug 15;13:e80622. doi: 10.7554/eLife.80622 (PMC11326776; doi:10.7554/eLife.80622)
Supplement: Figure 3—source data 1. [file elife-80622-fig3-data1.xlsx]

## Sheet: Figure 3
Figure 3-source data 1 - related to Figure 3A - cLTP - skeleton length of actin network										Figure 3-source data 4 - related to Figure 3F and Figure 3H - histograms - diffusion coefficient (D, μm2/s) for GluA1-HT vesicles
	Skeleton length (μm)									Trajectory	sLTP IN	sLTP OUT	sLTP+LatA IN
Dendrite	Control	cLTP								1	0.2088	0.34163	0.3735
1	263.32	353.63								2	0.1688	0.331	0.3613
2	80.14	196.39								3	0.157	0.2758	0.3131
3	54.83	102.7								4	0.149	0.2457	0.3089
4	95.2	154.95								5	0.1469	0.2328	0.2757
5	47.83	91.34								6	0.1427	0.201416	0.2466
6	81.32	191.9								7	0.1393	0.1943	0.2458
7	185.62	342.05								8	0.1365	0.1823	0.2284
8	52.33	285.31								9	0.128	0.1731	0.2118
9	110.9	199.87								10	0.1263	0.1649	0.2042
										11	0.119	0.1634	0.2007
										12	0.1177	0.1613	0.1918
Figure 3-source data 2 - related to Figure 3B - cLTP+LatA - skeleton length of actin network										13	0.1148	0.1598	0.1677
	Skeleton length (μm)									14	0.113	0.1577	0.1662
Dendrite	Control	cLTP+LatA								15	0.1116	0.1569	0.1618
1	40.39	38.03								16	0.1084	0.1529	0.1614
2	78.14	74.38								17	0.105	0.1509	0.1563
3	38.86	37.28								18	0.1017	0.1469	0.1527
4	16.47	12.16								19	0.0988	0.1459	0.1487
5	157.04	111.45								20	0.0973	0.1422	0.1462
6	150.2	93.42								21	0.0939	0.1399	0.1421
7	36.98	39.13								22	0.0888	0.1383	0.1356
8	56.16	68.98								23	0.0884	0.1337	0.1346
										24	0.0861	0.1313	0.1316
										25	0.0848	0.1301	0.1315
Figure 3-source data 3 - related to Figure 3E and Figure 3G - fraction of GluA1-HT vesicles exhibiting active transport										26	0.0833	0.1276	0.1281
	sLTP									27	0.0794	0.1236	0.1274
	IN		OUT							28	0.0784	0.1212	0.1264
Experiment	Pre	Post	Pre	Post						29	0.0756	0.1208	0.1235
1	0.33	0	0.36	0.29						30	0.0747	0.1189	0.1193
2	0.43	0	0.33	0.33						31	0.0722	0.1181	0.1142
3	0.33	0.17	0.44	0.5						32	0.0714	0.1169	0.1135
4	0.44	0	0.27	0.25						33	0.0691	0.1136	0.1125
5	0.4	0	0.4	0.33						34	0.0684	0.1131	0.1103
6	0.25	0.14	0.38	0.29						35	0.066	0.1105	0.1091
7	0.4	0.2	0.29	0.33						36	0.064	0.1092	0.1083
8	0.38	0	0.33	0.25						37	0.0613	0.1081	0.1076
9	0.5	0.17	0.38	0.29						38	0.0596	0.1065	0.1067
	sLTP+LatA									39	0.0581	0.1047	0.1046
	IN		OUT							40	0.0564	0.1036	0.1027
Experiment	Pre	Post	Pre	Post						41	0.0544	0.1029	0.0979
1	0.33	0.25	0.25	0.4						42	0.0525	0.098	0.0964
2	0.25	0.25	0.38	0.38						43	0.0524	0.0971	0.0942
3	0.36	0.38	0.2	0.29						44	0.0514	0.0968	0.0933
4	0.33	0.25	0.38	0.25						45	0.0488	0.0963	0.0912
5	0.57	0.4	0.5	0.43						46	0.0478	0.0949	0.0899
6	0.44	0.33	0.4	0.43						47	0.0468	0.0931	0.0866
7	0.33	0.2	0.33	0.2						48	0.0431	0.091	0.0864
										49	0.0418	0.0867	0.0863
										50	0.04	0.0862	0.0847
Figure 3-source data 5 - related to Figure 3I and Figure 3J - adjusted GluA1-HT vesicle counts										51	0.0389	0.0839	0.0836
	Adjusted vesicles counts									52	0.0375	0.0783	0.0789
	Pre			Post						53	0.0356	0.0762	0.0784
	Average	SD	Experiments	Average	SD	Experiments				54	0.0337	0.0752	0.076
sLTP IN	7	1.66	9	9.01	1.2	9				55	0.0328	0.0724	0.0714
sLTP OUT	8.56	1.74	9	6.73	1.8	9				56	0.0282	0.0713	0.0695
	Pre			Post						57	0.026	0.071	0.0684
sLTP+LatA IN	8.43	1.62	7	8.15	1.83	7				58	0.02412	0.0685	0.0614
sLTP+LatA OUT	10	1.15	7	10.06	1.2	7				59	0.0225	0.0661	0.0608
										60		0.0614	0.0603
										61		0.0608	0.059
										62		0.0603	0.0577
										63		0.0591	0.0542
										64		0.058	0.0522
										65		0.0564	0.051
										66		0.0542	0.0408
										67		0.0525	0.0252
										68		0.0512
										69		0.0495
										70		0.0451
										71		0.0408
										72		0.0383
										73		0.0253
