# Supplementary material for: Plasticity-induced actin polymerization in the dendritic shaft regulates intracellular AMPA receptor trafficking
Source: eLife. 2024 Aug 15;13:e80622. doi: 10.7554/eLife.80622 (PMC11326776; doi:10.7554/eLife.80622)
Supplement: Figure 4—source data 1. [file elife-80622-fig4-data1.xlsx]

## Sheet: Figure 4
Figure 4-source data 1 - related to Figure 4A - fraction of GluA1-HT vesicles exhibiting active transport							Figure 4-source data 2 - related to Figure 5B - histograms - diffusion coefficient (D, μm2/s) for GluA1-HT vesicles											Figure 4-source data 3 - related to Figure 4D - histograms - diffusion coefficient (D, μm2/s) for GEM									Figure 4-source data 4 - related to Figure 4E - histograms - diffusion coefficient (D, μm2/s) for GEM
	Active Transport						Trajectory	Control	Jsp	Jsp+MI								Trajectory	Control	cLTP	cLTP+LatA	JSP					Trajectory	No MNI IN	sLTP IN	sLTP OUT	sLTP+LatA IN
Experiment	Control	JSP	JSP+MI				1	0.4315	0.2042	0.1677								1	0.0505	0.0308	0.0562	0.0334					1	0.0412	0.0402	0.0608	0.0657
1	0.5	0.15	0.21				2	0.3766	0.2007	0.1557								2	0.056	0.0313	0.066	0.0402					2	0.051	0.0453	0.0757	0.0745
2	0.26	0.18	0.18				3	0.3634	0.1677	0.1474								3	0.0623	0.0448	0.0745	0.0421					3	0.0613	0.0502	0.0831	0.0809
3	0.45	0.24	0.16				4	0.3505	0.1662	0.1382								4	0.063	0.045	0.0821	0.0462					4	0.0757	0.0515	0.093	0.1113
4	0.27	0.18	0.25				5	0.3442	0.1635	0.1348								5	0.0854	0.0491	0.0958	0.0528					5	0.0885	0.0559	0.0938	0.127
5	0.42	0.27	0.18				6	0.3411	0.1623	0.1297								6	0.0869	0.0512	0.096	0.0591					6	0.0937	0.0621	0.1017	0.1483
6	0.43	0.12	0.17				7	0.3404	0.1557	0.1251								7	0.0917	0.0522	0.1108	0.0651					7	0.1013	0.0652	0.1092	0.1513
7	0.27	0.17	0.33				8	0.3131	0.1504	0.1215								8	0.0926	0.0575	0.1113	0.068					8	0.1029	0.0671	0.1128	0.1709
8	0.38	0.25	0.23				9	0.3121	0.1491	0.1171								9	0.0981	0.0609	0.1269	0.0731					9	0.119	0.0733	0.119	0.1715
9	0.36	0.18	0.19				10	0.302	0.1474	0.1107								10	0.0987	0.0616	0.139	0.0757					10	0.1319	0.0745	0.1238	0.1798
10	0.3						11	0.2965	0.1446	0.1096								11	0.1003	0.067	0.1397	0.0767					11	0.1357	0.0772	0.1301	0.1809
11	0.45						12	0.2925	0.1409	0.1082								12	0.1049	0.0672	0.1503	0.0804					12	0.1401	0.0832	0.1465	0.2008
12	0.38						13	0.2915	0.1404	0.1022								13	0.1055	0.0706	0.153	0.0813					13	0.1472	0.0893	0.1549	0.2094
							14	0.2815	0.1382	0.1013								14	0.1214	0.0716	0.1709	0.0847					14	0.1549	0.0898	0.1613	0.213
							15	0.2696	0.1379	0.0975								15	0.122	0.0799	0.1715	0.0941					15	0.1599	0.0951	0.177	0.2196
							16	0.2687	0.1372	0.0951								16	0.1299	0.0831	0.1806	0.0975					16	0.1771	0.0978	0.1773	0.2236
							17	0.2566	0.1369	0.0921								17	0.1332	0.0886	0.1809	0.1035					17	0.1838	0.1036	0.1838	0.2317
							18	0.2457	0.1348	0.0896								18	0.134	0.0933	0.1823	0.1095					18	0.1998	0.1094	0.1927	0.2499
							19	0.2416	0.1341	0.088								19	0.1351	0.0938	0.2029	0.1101					19	0.2041	0.115	0.1985	0.2511
							20	0.241	0.1327	0.0856								20	0.1351	0.0965	0.203	0.115					20	0.2142	0.1154	0.2002	0.2515
							21	0.2341	0.1297	0.084								21	0.1394	0.0966	0.2128	0.1154					21	0.2265	0.1208	0.2098	0.254
							22	0.2196	0.1294	0.0816								22	0.1401	0.1012	0.2236	0.1193					22	0.2322	0.1287	0.213	0.257
							23	0.2184	0.1279	0.0815								23	0.1402	0.1022	0.2288	0.1202					23	0.2571	0.1385	0.2181	0.2713
							24	0.2134	0.1257	0.0794								24	0.1425	0.1078	0.2317	0.1255					24	0.2673	0.139	0.2197	0.2717
							25	0.2065	0.1251	0.0792								25	0.143	0.1092	0.2499	0.1281					25	0.2707	0.1421	0.2236	0.272
							26	0.195	0.1246	0.0782								26	0.1432	0.1128	0.2513	0.1323					26	0.2875	0.1473	0.2264	0.2898
							27	0.1918	0.1232	0.0775								27	0.1439	0.1142	0.2516	0.1326					27	0.3062	0.148	0.2282	0.2909
							28	0.1895	0.1215	0.0729								28	0.1585	0.1184	0.254	0.1387					28	0.3123	0.1555	0.2322	0.2921
							29	0.1892	0.1214	0.0692								29	0.1597	0.119	0.2571	0.1412					29	0.3152	0.157	0.249	0.2982
							30	0.1872	0.1211	0.069								30	0.1599	0.1275	0.2713	0.1423					30	0.3267	0.1613	0.2497	0.2982
							31	0.187	0.12	0.0687								31	0.1635	0.1279	0.2716	0.1481					31	0.3272	0.1619	0.2499	0.3007
							32	0.1838	0.1171	0.0678								32	0.1637	0.1299	0.2723	0.1556					32	0.3292	0.1707	0.2515	0.3152
							33	0.1837	0.1164	0.0672								33	0.1644	0.1358	0.2909	0.157					33	0.3511	0.1776	0.2573	0.3172
							34	0.1829	0.1126	0.0658								34	0.1666	0.14	0.2921	0.1687					34	0.3961	0.179	0.2682	0.3332
							35	0.1826	0.1115	0.0627								35	0.1748	0.1409	0.2983	0.1707					35	0.4404	0.1845	0.2713	0.3334
							36	0.1813	0.1107	0.0612								36	0.1759	0.1472	0.3153	0.1708					36	0.4702	0.1865	0.2821	0.3436
							37	0.1747	0.1098	0.0597								37	0.1762	0.1599	0.3332	0.1773					37	0.5021	0.193	0.2909	0.3445
							38	0.1744	0.1096	0.0571								38	0.1768	0.1676	0.3436	0.1778					38	0.5091	0.1956	0.3006	0.3544
							39	0.1737	0.1096	0.0561								39	0.1868	0.177	0.3618	0.1846					39	0.5431	0.1973	0.3061	0.3579
							40	0.1681	0.1095	0.0553								40	0.2069	0.1836	0.4162	0.1853					40	0.5723	0.2048	0.3123	0.3625
							41	0.1654	0.1095	0.0547								41	0.2087	0.1913	0.4227	0.1865					41	0.601	0.2067	0.3171	0.4123
							42	0.161	0.1091	0.0535								42	0.2187	0.1929	0.4265	0.193					42	0.641	0.2151	0.3267	0.4174
							43	0.1578	0.1082	0.0509								43	0.2273	0.2002	0.4298	0.1973					43	0.7097	0.2328	0.3293	0.4268
							44	0.1556	0.1065	0.0502								44	0.235	0.2033	0.4378	0.2043					44	0.8569	0.2373	0.3436	0.433
							45	0.1549	0.1054	0.0478								45	0.2371	0.2041	0.4544	0.2049					45		0.2614	0.3625	0.4378
							46	0.1539	0.1039	0.0468								46	0.2404	0.2142	0.5091	0.2068					46		0.2739	0.396	0.4574
							47	0.1527	0.1022	0.0465								47	0.2477	0.2181	0.5123	0.2152					47		0.2765	0.426	0.4651
							48	0.1524	0.102	0.0416								48	0.2618	0.2183	0.5385	0.225					48		0.3022	0.4702	0.5123
							49	0.1518	0.1018	0.0357								49	0.2634	0.2241	0.545	0.2261					49		0.3177	0.5385	0.5367
							50	0.1515	0.1017	0.0351								50	0.2665	0.2264	0.615	0.2328					50		0.3293	0.641	0.545
							51	0.1513	0.1013	0.0348								51	0.2677	0.2265	0.6477	0.2329					51		0.3321	0.7013	0.6174
							52	0.1488	0.099	0.0331								52	0.2767	0.232	0.721	0.2373					52		0.3402	0.8281	0.6225
							53	0.1463	0.0988	0.0327								53	0.2779	0.2322	0.7517	0.2383					53		0.365		0.6988
							54	0.1457	0.0976	0.0289								54	0.29	0.2485	0.8165	0.2596					54		0.426		0.7517
							55	0.1453	0.0975	0.0284								55	0.3089	0.249	0.961	0.2617					55		0.4839		0.8165
							56	0.1448	0.0973	0.0244								56	0.3185	0.2497	1.0555	0.274					56		0.5548		0.8791
							57	0.1438	0.0957	0.024								57	0.3239	0.2573	1.3854	0.2758					57		0.6261		1.1146
							58	0.1432	0.0954	0.0236								58	0.3246	0.2682		0.3015					58		0.7584		1.2294
							59	0.1423	0.0951	0.0213								59	0.3248	0.2822		0.3174					59		0.8281
							60	0.1415	0.0949	0.0202								60	0.3369	0.2875		0.3177
							61	0.1407	0.0941									61	0.3373	0.3062		0.3309
							62	0.1398	0.0929									62	0.34	0.3123		0.3401
							63	0.138	0.0921									63	0.34	0.3152		0.3542
							64	0.1361	0.0911									64	0.3517	0.3267		0.4071
							65	0.1359	0.0909									65	0.3536	0.3272		0.433
							66	0.1355	0.0896									66	0.3538	0.3511		0.4839
							67	0.135	0.089									67	0.3686	0.4227		0.6261
							68	0.1323	0.0888									68	0.3789	0.4404		0.7584
							69	0.132	0.0886									69	0.3808	0.5431
							70	0.1317	0.088									70	0.3864	0.5431
							71	0.1314	0.0875									71	0.3895	0.5723
							72	0.1309	0.0873									72	0.3906	0.5723
							73	0.1303	0.0864									73	0.3957	0.641
							74	0.1298	0.0856									74	0.3986	0.8281
							75	0.1295	0.0849									75	0.3999
							76	0.1292	0.0847									76	0.4241
							77	0.129	0.0846									77	0.435
							78	0.1236	0.084									78	0.4351
							79	0.1234	0.0826									79	0.4406
							80	0.1233	0.0818									80	0.446
							81	0.1216	0.0817									81	0.4486
							82	0.1213	0.0815									82	0.4711
							83	0.1213	0.0812									83	0.4833
							84	0.1209	0.0803									84	0.5174
							85	0.1201	0.08									85	0.5184
							86	0.1197	0.0792									86	0.5345
							87	0.1194	0.0788									87	0.5599
							88	0.118	0.0788									88	0.605
							89	0.117	0.0775									89	0.6745
							90	0.1168	0.076									90	0.7141
							91	0.1157	0.0758									91	0.7364
							92	0.1157	0.0729									92	0.8895
							93	0.1148	0.0714									93	1.0949
							94	0.1138	0.0713									94	1.2064
							95	0.1134	0.0701
							96	0.1132	0.0692
							97	0.1125	0.0691
							98	0.1106	0.0689
							99	0.11	0.0688
							100	0.1097	0.0686
							101	0.1095	0.0682
							102	0.1085	0.0682
							103	0.1082	0.0678
							104	0.1082	0.0675
							105	0.1081	0.0675
							106	0.1074	0.0673
							107	0.1071	0.0668
							108	0.1048	0.0659
							109	0.1047	0.0658
							110	0.1026	0.065
							111	0.102	0.0637
							112	0.102	0.0637
							113	0.0995	0.0627
							114	0.0972	0.0623
							115	0.0951	0.0623
							116	0.095	0.0612
							117	0.0943	0.0608
							118	0.0935	0.0605
							119	0.0935	0.0601
							120	0.0926	0.0597
							121	0.0915	0.0596
							122	0.0914	0.0583
							123	0.0908	0.0571
							124	0.0903	0.057
							125	0.0902	0.0561
							126	0.0895	0.0561
							127	0.0893	0.0557
							128	0.0892	0.0555
							129	0.0886	0.0553
							130	0.088	0.0548
							131	0.0861	0.0548
							132	0.0857	0.0547
							133	0.084	0.0546
							134	0.0839	0.0542
							135	0.0833	0.0535
							136	0.0833	0.0534
							137	0.0832	0.0518
							138	0.0832	0.051
							139	0.0824	0.0502
							140	0.0823	0.05
							141	0.0816	0.0483
							142	0.0811	0.0478
							143	0.081	0.0478
							144	0.0798	0.0474
							145	0.0793	0.0466
							146	0.0782	0.0465
							147	0.0754	0.0451
							148	0.0747	0.0444
							149	0.0744	0.0429
							150	0.0737	0.042
							151	0.0733	0.0416
							152	0.073	0.0415
							153	0.0721	0.0401
							154	0.072	0.0371
							155	0.0717	0.0357
							156	0.0715	0.0351
							157	0.0701	0.0346
							158	0.07	0.0345
							159	0.0691	0.0331
							160	0.0689	0.0331
							161	0.0688	0.0329
							162	0.0679	0.0329
							163	0.0678	0.0327
							164	0.0677	0.0299
							165	0.0675	0.0298
							166	0.0669	0.029
							167	0.0661	0.0286
							168	0.0657	0.0286
							169	0.0655	0.0284
							170	0.0648	0.0275
							171	0.0644	0.0252
							172	0.0641	0.0241
							173	0.0633	0.024
							174	0.063	0.0221
							175	0.0625	0.0213
							176	0.061	0.0213
							177	0.0607	0.0203
							178	0.0607	0.0202
							179	0.0606
							180	0.0605
							181	0.0598
							182	0.0591
							183	0.0579
							184	0.0575
							185	0.0571
							186	0.0568
							187	0.0566
							188	0.055
							189	0.055
							190	0.054
							191	0.0526
							192	0.0521
							193	0.0517
							194	0.0516
							195	0.0515
							196	0.0511
							197	0.051
							198	0.0509
							199	0.0502
							200	0.049
							201	0.0482
							202	0.0449
							203	0.0431
							204	0.0425
							205	0.0424
							206	0.0423
							207	0.0422
							208	0.0418
							209	0.0417
							210	0.0415
							211	0.0403
							212	0.0403
							213	0.0399
							214	0.0392
							215	0.0384
							216	0.0381
							217	0.0369
							218	0.0364
							219	0.0358
							220	0.0338
							221	0.0336
							222	0.0334
							223	0.0333
							224	0.0327
							225	0.0317
							226	0.0315
							227	0.0246
