# Supplementary material for: Plasticity-induced actin polymerization in the dendritic shaft regulates intracellular AMPA receptor trafficking
Source: eLife. 2024 Aug 15;13:e80622. doi: 10.7554/eLife.80622 (PMC11326776; doi:10.7554/eLife.80622)
Supplement: Figure 5—figure supplement 1—source data 1. [file elife-80622-fig5-figsupp1-data1.xlsx]

## Sheet: Figure 5-figure supplement 1
Figure 5-figure supplement 1-source data 1 - related to Figure 5-figure supplement 1B - Two-color HCR RNA-FISH for HaloTag-SEP mRNA and Gria1 mRNA
	Fraction with correlated localization
Cell	HT-SEP	G1
1	0.66	0.63
2	0.67	0.65
3	0.85	0.83
4	0.86	0.87
5	0.81	0.82
6	0.88	0.86
7	0.83	0.83
8	0.73	0.72
9	0.84	0.8
10	0.78	0.74
Figure 5-figure supplement 1-source data 2- related to Figure 5-figure supplement 1D - colocalization between GluA1-HT-SEP and GluA1 in knock-in neurons
	Coefficient - GluA1 vs GluA1-HT-SEP
Cell	PCC	MC1	MC2
1	0.78	0.91	0.83
2	0.82	0.9	0.9
3	0.79	0.85	0.77
4	0.76	0.84	0.78
5	0.82	0.92	0.87
6	0.56	0.61	0.5
7	0.58	0.74	0.64
8	0.64	0.81	0.73
Figure 5-figure supplement 1-source data 3- related to Figure 5-figure supplement 1F (top) - distance between GluA1/GluA1-HT-SEP puncta and PSD protein puncta
	GluA1			GluA1-HT-SEP
	Average distance (μm)	Std Dev	Pairs of puncta	Average distance (μm)	Std Dev	Pairs of puncta
Homer1c	0.144	0.044	55	0.149	0.056	60
PSD95	0.126	0.028	50	0.124	0.03	50
GluN1	0.148	0.051	110	0.145	0.059	145
Figure 5-figure supplement 1-source data 4- related to Figure 5-figure supplement 1F (bottom) - fraction of spines with a PSD marker alone, GluA1/GluA1-HT-SEP alone, or both a PSD marker and GluA1/GluA1-HT-SEP
		Fraction of spines
		PSD marker only	GluA1/GluA1-HT-SEP only	PSD and GluA1/GluA1-HT-SEP
Homer1c	GluA1-HT-SEP	0.17	0.03	0.8
	GluA1	0.13	0.09	0.78
PSD95	GluA1-HT-SEP	0.21	0.03	0.76
	GluA1	0.17	0.07	0.76
GluN1	GluA1-HT-SEP	0.1	0.02	0.88
	GluA1	0.12	0.03	0.85
																		#DIV/0!										#DIV/0!	#DIV/0!
																												#DIV/0!	#DIV/0!
																												0	0
																												0.148667	0.0555425	60
																		Homer - HT										0.144436	0.0444484	55
																		0.148667
																		0.0555425										0.12382	0.0300569	50
																		60										0.12634	0.0275419	50
																												0.144586	0.059016	145
																												0.148136	0.0510149	110
