# Supplementary material for: Plasticity-induced actin polymerization in the dendritic shaft regulates intracellular AMPA receptor trafficking
Source: eLife. 2024 Aug 15;13:e80622. doi: 10.7554/eLife.80622 (PMC11326776; doi:10.7554/eLife.80622)
Supplement: Figure 5—figure supplement 2—source data 1. [file elife-80622-fig5-figsupp2-data1.xlsx]

## Sheet: Figure 5-figure supplement 2
Figure 5 - figure supplement 2-source data 1 - related to Figure 5-figure supplement 2A - peak current density (pA/pF) in HEK293T cells expressing GluA1 versus GluA1-HT-SEP
	Peak current density (pA/pF)
Cell	GluA1	GluA1-HT-SEP	No Transfection
1	-14.226	-10.823	-0.818
2	-9.863	-11.34	-0.699
3	-22.665	-24.175	-1.019
4	-9.786	-24.831	-0.597
5	-14.398	-5.631	-0.55
6	-68.574	-17.79	-0.653
7	-29.864	-23.987	-0.97
8	-6.01	-21.615	-0.728
9	-10.329	-36.588	-1.666
10	-7.651	-15.045	-0.807
11	-5.875	-6.888	-1.077
12	-7.819	-9.716	-0.959
13	-11.859		-0.747
Figure 5 - figure supplement 2-source data 2 - related to Figure 5-figure supplement 2B - peak current density (pA/pF) in unlabeled versus GluA1-HT-SEP neurons
	Peak current density (pA/pF)
Cell	WT	GluA1-HT-SEP
1	-11.958	-13.676
2	-7.751	-10.456
3	-8.068	-8.872
4	-12.307	-11.071
5	-9.996	-11.212
6	-12.115	-10.234
7	-10.819	-18.67
8	-8.031	-19.954
9	-11.677	-12.259
10	-6.882	-23.486
11	-8.704	-20.309
12	-6.935	-15.767
13	-9.183	-31.222
14	-7.329	-28.311
15	-13.833
16	-16.818
17	-17.115
18	-19.364
19	-21.749
