# Supplementary material for: Plasticity-induced actin polymerization in the dendritic shaft regulates intracellular AMPA receptor trafficking
Source: eLife. 2024 Aug 15;13:e80622. doi: 10.7554/eLife.80622 (PMC11326776; doi:10.7554/eLife.80622)
Supplement: Figure 5—figure supplement 3—source data 1. [file elife-80622-fig5-figsupp3-data1.xlsx]

## Sheet: Figure 5-figure supplement 3
Figure 5 - figure supplement 3-source data 1- related to Figure 5-figure supplement 3 - GluA1-HT-SEP exocytic events (μm-1 min-1) after sLTP in the absence of MNI
	GluA1-HT-SEP exocytic events - No MNI
	Proximal		Distal
Experiment	Pre	Post	Pre	Post
1	0.04	0	0.04	0.08
2	0.12	0.12	0.12	0.1
3	0	0.16	0.08	0.12
4	0.12	0.08	0.08	0.08
5	0.12	0.04	0.06	0.04
6	0	0.12	0.06	0.08
