# Supplementary material for: Plasticity-induced actin polymerization in the dendritic shaft regulates intracellular AMPA receptor trafficking
Source: eLife. 2024 Aug 15;13:e80622. doi: 10.7554/eLife.80622 (PMC11326776; doi:10.7554/eLife.80622)
Supplement: Figure 5—source data 1. [file elife-80622-fig5-data1.xlsx]

## Sheet: Figure 5
Figure 5-source data 1 - related to Figure 5B - rates of GluA1-HT-SEP exocytosis (events/μm/min)
Experiment	NS	cLTP	cLTP+LatA	cLTP+MI
1	0.05	0.35	0.08	0.12
2	0.11	0.25	0.12	0.16
3	0.07	0.29	0.09	0.17
4	0.11	0.36	0.09	0.08
5	0.12	0.33	0.07	0.21
6	0	0.28	0.11	0.13
7	0.03	0.27	0.13	0.11
8	0.07	0.2	0.07	0.19
9	0.01	0.25	0.09	0.16
10	0.04	0.24	0.11	0.09
11	0	0.31	0.04	0.15
12	0.09	0.13	0.16	0.15
Figure 5-source data 2 - related to Figure 5C - rates of GluA1-HT-SEP exocytosis (events/μm/min)
	Proximal
	sLTP		sLTP+LatA		sLTP+MI
Experiment	Pre	Post	Pre	Post	Pre	Post
1	0.08	0.28	0.04	0.12	0.12	0.16
2	0.04	0.32	0	0.08	0.04	0.16
3	0	0.24	0.08	0.16	0	0.04
4	0.08	0.2	0	0.04	0.08	0.16
5	0	0.28	0.12	0.16	0.04	0.12
6	0.08	0.2	0	0.08	0.08	0.2
7	0.04	0.28
8	0.08	0.32
9	0.12	0.36
10	0.08	0.12
11	0.04	0.28
12	0	0.2
	Distal
	sLTP		sLTP+LatA		sLTP+MI
Experiment	Pre	Post	Pre	Post	Pre	Post
1	0.04	0.08	0.06	0.04	0.08	0.08
2	0.08	0.06	0.04	0.04	0.06	0.08
3	0.04	0.06	0.06	0.08	0.04	0.06
4	0.02	0.04	0.02	0.04	0.06	0.04
5	0	0.04	0.04	0.06	0	0.04
6	0.06	0.04	0.02	0	0.06	0.04
7	0.06	0.1
8	0.06	0.08
9	0.06	0.06
10	0.08	0.12
11	0.06	0.08
12	0.06	0.06
