# Supplementary material for: Plasticity-induced actin polymerization in the dendritic shaft regulates intracellular AMPA receptor trafficking
Source: eLife. 2024 Aug 15;13:e80622. doi: 10.7554/eLife.80622 (PMC11326776; doi:10.7554/eLife.80622)
Supplement: Figure 6—figure supplement 1—source data 1. [file elife-80622-fig6-figsupp1-data1.xlsx]

## Sheet: Figure 6-figure supplement 1
Figure 6 - figure supplement 1-source data 1- related to Figure 6-figure supplement 1B-C - Fraction of non- and pre-exocytosis GluA1-HT-SEP vesicles exhibiting active transport after sLTP or cLTP
	Pre-exocytosis			Non-exocytosis
	Average	Std Dev	Experiments	Average	Std Dev	Experiments
No MNI	0.1	0.18	12	0.38	0.13	12
sLTP	0.46	0.26	12	0.09	0.11	12
SLTP+LatA	0.08	0.12	9	0.29	0.14	9
sLTP+MI	0.08	0.18	9	0.1	0.13	9
	Pre-exocytosis			Non-exocytosis
	Average	Std Dev	Experiments	Average	Std Dev	Experiments
Control	0.14	0.11	12	0.41	0.06	12
cLTP	0.39	0.15	12	0.08	0.08	12
cLTP+LatA	0.1	0.1	9	0.26	0.06	9
cLTP+MI	0.07	0.1	9	0.09	0.06	9
