# Supplementary material for: Plasticity-induced actin polymerization in the dendritic shaft regulates intracellular AMPA receptor trafficking
Source: eLife. 2024 Aug 15;13:e80622. doi: 10.7554/eLife.80622 (PMC11326776; doi:10.7554/eLife.80622)
Supplement: Figure 6—figure supplement 2—source data 1. [file elife-80622-fig6-figsupp2-data1.xlsx]

## Sheet: Figure 6-figure supplement 2
Figure 6 - figure supplement 2-source data 1 - related to Figure 6-figure supplement 2A-B - directional bias (theta) of pre-exocytosis GluA1-HT-SEP vesicles														Figure 6 - figure supplement 2-source data 3 - related to Figure 6-figure supplement 2D-H - directional bias (theta) of GluA1-HT vesicles
	No MNI				Pre-exocytosis										GluA1-HT vesicles
Trajectory	Non-exocytosis	Pre-exocytosis		Trajectory	Control	cLTP	cLTP+LatA	cLTP+MI						Trajectory	No MNI	sLTP	Control	cLTP	sLTP+LatA	sLTP+MI	cLTP+LatA	cLTP+MI	cLTP+Va-DN	cLTP+Vb-DN	cLTP+VI-DN	JSP+MI
1	0.8874	0.0615		1	0.0239	0.0598	0.2751	0.0227						1	1.5125	0.1183	0.1013	0.0619	8.5439	8.4348	13.0155	0.816	6.0811	0.7904	1.3293	0.1951
2	6.2567	0.6182		2	0.7245	0.0619	1.0455	0.0674						2	9.6202	0.428	1.122	0.0743	14.8535	10.2243	15.7872	5.3527	6.901	7.9612	1.4242	1.7785
3	13.5447	4.6344		3	1.828	0.0933	4.3953	3.4874						3	13.9161	1.2741	1.3096	0.2752	15.2751	15.6984	16.1943	6.1415	9.8281	12.89	2.9811	3.6713
4	18.3789	6.3303		4	5.2023	0.3211	10.151	3.7497						4	14.9085	1.9787	4.0344	0.31	21.7063	17.5011	16.5401	7.3002	13.124	14.6015	3.2177	4.3608
5	20.3679	14.9831		5	6.3458	0.8498	10.2243	6.8389						5	17.4011	2.6886	5.475	0.5135	22.0412	21.9756	17.0826	8.9192	13.1699	15.0753	4.1542	6.0638
6	20.6678	15.2672		6	8.9379	0.9434	10.5561	8.9831						6	21.7133	4.5236	6.7105	0.5458	22.7111	23.0521	17.2821	10.6847	14.1003	19.643	6.113	8.7716
7	26.2201	18.1767		7	9.2314	1.6255	12.7854	10.2111						7	23.3183	8.31	8.2559	0.6815	27.2801	26.1628	17.4755	12.9402	16.5616	23.0042	7.6758	10.2614
8	29.6988	20.4722		8	10.6634	2.0963	15.2871	15.3425						8	28.4433	8.8822	9.5907	0.8498	30.828	30.7243	20.2832	13.5848	17.1303	25.1485	7.9555	12.1091
9	31.2669	21.15		9	11.7063	2.5949	16.378	17.3496						9	30.8557	10.142	10.9157	0.9434	32.4814	31.9918	21.3184	15.8924	20.1875	25.3531	10.0171	13.8528
10	33.6712	26.8003		10	11.7779	2.7472	18.5131	17.7229						10	34.241	11.6717	11.1321	1.1814	34.1142	34.5173	21.4904	17.124	20.9507	26.1508	11.848	16.3404
11	35.3511	27.2802		11	13.7198	3.2812	20.688	19.4021						11	37.5396	12.8005	11.7665	1.5326	37.8221	36.6934	22.0321	20.4327	21.8222	27.1953	13.2755	17.3038
12	37.961	29.3903		12	15.9954	3.6326	22.8934	20.3576						12	39.9202	14.3247	13.2049	1.6255	41.7334	37.1487	23.5664	21.5252	26.0586	28.5769	13.9194	18.3868
13	38.6778	31.766		13	19.4681	4.998	25.9845	21.4243						13	41.4513	17.353	13.9131	1.8388	42.1088	39.1204	24.6293	23.8066	27.955	35.0172	14.8588	22.1394
14	41.15	33.4718		14	20.1963	5.4729	26.7625	21.9861						14	44.599	18.6096	14.1618	2.0398	42.8439	40.8911	25.8844	26.2821	29.6619	35.8733	15.6456	23.3227
15	44.4342	37.2378		15	21.2335	6.1325	29.853	22.1342						15	47.8377	19.3192	14.4343	2.3289	48.0159	42.0701	25.9142	27.6787	31.18	36.9742	15.7051	23.9782
16	46.3556	38.4098		16	23.0521	6.73	30.6282	25.0529						16	49.3433	20.4749	15.9296	2.5949	48.8824	43.774	25.9845	29.5253	32.5658	37.7824	16.5215	25.3113
17	46.6608	38.9086		17	23.2767	7.0675	31.5829	26.5742						17	52.1081	23.0567	17.9531	2.6322	50.0202	44.2026	26.7604	29.8212	33.5552	38.1732	18.8814	26.4327
18	47.2318	44.6348		18	27.2801	8.9778	32.9869	26.8956						18	52.9838	23.217	18.6235	2.7327	51.6392	46.3052	27.1821	30.1958	35.5172	40.9732	18.9814	28.3779
19	52.9357	45.3401		19	27.4357	9.2293	33.2476	30.1563						19	54.3784	25.325	20.2652	2.7472	51.9865	49.561	28.2117	30.683	36.1088	42.8894	19.4291	29.1212
20	55.9424	46.6782		20	28.0892	10.6929	35.4562	30.5239						20	56.7766	25.3627	20.3628	3.1889	54.3435	50.263	28.5359	30.7715	36.843	44.3892	21.0345	30.1566
21	57.2165	48.7592		21	29.1846	10.7328	35.5352	30.6534						21	58.9739	26.7227	21.0154	3.2812	55.8373	50.3766	30.0921	32.0069	37.2764	45.443	21.1796	31.7487
22	58.2185	51.8663		22	34.8363	12.4836	40.1212	33.5264						22	59.3269	29.0911	21.447	3.3467	56.4548	51.8894	30.3803	36.9202	37.4698	45.6603	22.4779	32.533
23	59.1732	51.9556		23	34.9183	12.585	40.3676	36.0778						23	62.9326	29.8518	22.9895	3.6326	59.1972	54.8349	30.4862	37.4311	40.5093	47.0026	24.9975	33.1423
24	59.2999	56.4241		24	35.6583	13.4533	40.8911	36.6716						24	64.4208	30.1663	23.5731	3.7123	60.0603	57.2926	30.7034	39.424	40.9515	49.5313	26.9019	34.9033
25	64.9756	56.5672		25	36.6618	13.4928	41.513	40.2026						25	64.8649	33.7194	24.1154	4.0305	60.8348	58.0471	30.8851	40.26	42.5167	50.9665	27.164	39.0898
26	66.3685	64.2544		26	37.654	13.8393	44.0949	41.7757						26	66.412	34.0379	24.3969	4.3564	63.0027	59.4548	32.5743	40.6335	43.4891	52.032	28.1256	40.1098
27	66.4788	65.5232		27	37.8221	13.9235	45.9834	41.8099						27	68.5187	37.4711	25.0741	4.6115	63.7706	60.4834	33.0565	41.7201	43.6675	52.3107	28.5837	41.3273
28	67.2315	66.8909		28	43.4666	15.0253	47.4445	43.1415						28	68.9184	37.9022	25.395	4.7711	63.7909	60.5695	34.1117	41.7453	44.3998	54.4063	30.9916	42.9282
29	68.1125	68.8819		29	43.5028	15.2398	47.8997	43.5791						29	70.1235	40.4274	26.7835	4.7852	64.6132	60.9018	34.3412	42.9531	44.7665	55.4823	33.6679	46.3613
30	71.9185	70.9193		30	44.0208	18.5282	49.6678	44.5685						30	73.2743	40.9251	27.3062	4.8107	65.2543	61.1433	35.4562	43.0898	45	55.9644	34.5313	47.6538
31	71.9858	72.1031		31	44.9454	18.613	50.1664	46.4467						31	74.1121	41.6022	28.0038	4.9882	65.6707	61.9394	35.5867	44.8013	45.9048	57.0156	35.0942	50.3798
32	72.5523	75.3813		32	48.5556	20.0119	50.8354	47.6473						32	75.5343	46.4224	28.1411	4.998	68.0555	63.3243	35.674	45.7081	46.3473	58.9785	36.9782	51.2239
33	73.2345	75.3921		33	48.8889	20.0225	51.0228	49.0262						33	77.3643	47.0984	29.4537	5.1723	68.2242	65.491	35.7926	49.1177	46.9958	60.1831	37.1471	52.7198
34	73.6012	77.0548		34	50.3766	20.0402	51.5857	50.7807						34	77.4854	49.417	29.9416	5.4492	70.9734	68.372	36.1656	50.0844	47.2738	60.5809	41.1707	53.3114
35	75.6794	77.1289		35	51.6533	20.1224	56.2312	52.569						35	78.6629	50.577	31.19	5.4495	72.5552	70.8019	36.5979	50.1224	47.6481	62.4893	41.3018	54.3209
36	76.2489	82.0085		36	52.7037	20.6041	57.1027	54.466						36	80.4783	50.9627	31.8132	5.4729	73.2382	70.9247	36.8993	50.3225	48.6191	62.8748	42.7514	55.4116
37	76.8385	88.2334		37	53.102	21.1061	58.6521	57.4074						37	80.6721	53.345	32.2696	5.5628	73.776	71.4128	37.1431	51.9611	51.3388	65.6601	42.7534	57.4268
38	77.6984	89.9743		38	53.1524	22.568	61.9897	57.6793						38	81.6066	54.6158	33.3559	5.8905	75.1494	71.5434	37.2923	52.9337	52.3934	66.3232	43.6894	59.7571
39	78.3659			39	56.2342	25.4489	62.9145	59.4454						39	82.0217	55.1507	33.537	6.0899	76.061	72.0052	37.3047	53.4418	54.4083	69.0443	43.9936	60.886
40	79.2238			40	56.4925	25.522	63.9838	62.361						40	82.9143	58.02	34.3482	6.1334	77.4282	73.1416	37.3341	53.6682	55.1059	70.0698	45.8572	61.5452
41	79.3489			41	57.1918	25.7944	66.0686	63.0337						41	83.1273	59.0597	35.825	6.2783	79.0367	77.5983	37.7498	54.1452	56.8981	71.5354	46.9097	62.2841
42	79.6664			42	58.6098	25.8923	67.3243	66.4418						42	84.7309	61.6348	36.3024	6.3786	79.9983	79.3859	37.8494	54.5125	57.5511	73.0217	46.9166	62.9623
43	79.8887			43	61.7522	26.1722	70.0191	66.8525						43	86.1788	62.8377	36.412	6.585	80.7624	79.7206	38.382	56.4269	58.6093	74.4974	48.285	65.3354
44	81.121			44	63.1123	26.2784	74.2978	69.1237						44	86.3513	64.5958	36.9701	6.73	80.948	80.4647	38.6402	57.7716	59.1573	78.4232	48.3605	66.39
45	81.232			45	63.5512	32.1364	75.1044	71.2358						45	86.7251	66.4942	37.2076	6.8044	81.4552	82.3123	39.1506	57.8149	59.3447	79.4208	50.8311	67.825
46	81.4887			46	64.6478	32.2368	75.2896	72.6945						46	87.2656	67.6215	37.864	6.9638	82.323	83.5019	39.5365	59.06	59.8207	80.5183	51.3049	68.4757
47	82.4424			47	66.7398	32.4427	77.9526	76.8673						47	88.4292	68.366	38.5237	7.0675	82.5493	83.7748	40.5116	60.1663	60.9089	81.0555	51.8044	69.1437
48	82.8014			48	68.0555	32.7591	78.0494	76.9617						48	88.6813	71.494	39.1506	7.2011	82.9348	83.9971	40.818	60.544	61.9979	83.6909	52.3213	70.7405
49	83.2663			49	69.6955	35.4229	81.0944	79.3643						49	89.1209	73.5101	39.3997	7.7479	83.8347	86.6555	40.9166	61.5279	63.1396	84.587	57.5401	71.5123
50	83.7819			50	71.6631	35.6897	81.3023	81.3965						50	89.9015	74.0244	40.8378	8.089	84.3272	86.779	41.0501	61.5925	63.3502	85.0487	59.7663	72.0316
51	84.0674			51	72.3444	35.7526	82.8845	85.5428						51	89.9181	75.0206	40.9166	8.1328	84.5522	87.1817	41.8981	62.6973	65.0718	86.1991	61.4938	73.3189
52	84.1233			52	72.453	35.8567	85.8532	86.3683						52		75.824	41.3919	8.9778	86.1843	87.5639	42.1349	63.3408	65.1745	87.1661	62.7543	73.7562
53	84.7889			53	73.1416	36.2428	86.1885	87.2538						53		77.5578	41.5217	9.6342	86.3184	87.8349	42.3624	64.2208	66.2883		63.5165	76.4568
54	85.0897			54	76.4665	36.4027	89.8484	88.5372						54		82.978	42.0083	10.0357	86.3339	88.1921	42.551	64.8568	66.6169		64.8279	77.1145
55	85.1052			55	79.485	41.8798								55		84.9821	42.7076	10.2037	86.7053		42.8128	64.8986	67.0762		65.2671	78.8216
56	85.1298			56	81.1397	42.0183								56		85.3608	42.8468	10.2111	87.0267		42.9281	66.7905	68.7531		65.2997	81.185
57	85.3547			57	81.9532	45.8164								57		86.2416	43.6823	10.3678	87.3723		43.046	66.9607	69.653		67.7975	81.7498
58	85.4528			58	82.6202	48.0923								58		88.0843	43.8859	10.6929	87.6234		43.5021	67.347	70.9951		69.4577	82.6886
59	85.6999			59	83.2817	49.4339								59		88.8481	44.9782	11.1126	87.7643		43.9828	68.4572	71.2416		70.02	83.7861
60	86.1601			60	84.4224	49.6576								60			45.0057	11.4437	88.209		44.1491	68.6012	72.6714		71.618	89.4797
61	86.2654			61	84.9207	49.9723								61			45.8334	11.5619	88.2917		44.4368	69.9892	73.3765		72.3802
62	86.3357			62	86.6572	51.8926								62			46.3052	11.8763	88.4182		45.2283	70.1392	74.9902		73.2781
63	86.6543			63	88.0452	52.1376								63			47.2769	11.8835	88.9212		45.6683	71.1164	75.5501		73.8754
64	86.6914			64	88.5058	55.6516								64			47.4557	12.4836	88.9953		45.8821	72.0816	77.8066		74.4405
65	86.7895			65	89.3894	58.6853								65			48.4446	12.4885	89.2356		46.6486	73.3089	80.0635		76.8463
66	86.8999			66		60.2359								66			48.6079	12.555	89.5359		47.3112	73.6301	80.8166		78.036
67	87.0548			67		64.5376								67			48.7771	12.8166	89.9276		47.4248	74.3959	81.001		79.0525
68	87.1155			68		65.0744								68			49.3578	12.8882			47.5002	75.5213	82.1936		79.3239
69	87.689			69		68.1554								69			50.0202	13.2371			47.5723	76.6568	84.102		80.1806
70	88.5452			70		70.9993								70			50.165	14.0395			48.4377	76.7183	86.1194		80.5246
71	89.1124			71		72.0684								71			50.7258	14.0653			48.6991	78.0722	88.7301		80.991
72	89.4394			72		72.1924								72			51.2297	14.1232			48.7907	78.224	89.2592		81.6116
73	89.7216			73		80.1212								73			51.597	14.1267			48.8425	80.0535			82.693
74	89.7305			74		82.0544								74			52.0105	14.192			49.9179	81.342			84.0586
75	89.9134			75		84.5522								75			52.7717	14.2264			50.8835	82.008			85.1
														76			52.8851	14.3473			51.1634	82.694			86.8307
														77			53.1957	14.5407			51.2979	84.8014			88.6331
														78			53.4305	14.9253			51.5694	86.523			89.4982
														79			53.5622	14.9697			52.054	86.5703
														80			53.9012	15.0253			52.2184	87.5192
Figure 6 - figure supplement 2-source data 2 - related to Figure 6-figure supplement 2C - Motion states of GluA1-HT-SEP vesicles after stimulation binned by directional bias														81			54.4234	15.3856			52.4589	88.1983
	Bin center													82			54.8349	15.5658			53.102	89.8241
Trajectory	5	15	25	35	45	55	65	75	85					83			54.8876	15.713			53.6851
1	0.0126	10.2679	20.0119	30.287	41.8798	51.1572	60.2359	70.9993	80.1212					84			55.1048	15.7235			54.1734
2	0.0598	10.6929	20.0225	31.2371	42.0183	51.8926	62.8986	71.0335	80.5498					85			55.509	16.0539			54.3498
3	0.0619	10.7328	20.0402	32.1364	42.2446	52.1376	64.5376	72.0684	80.5689					86			55.5875	16.3624			54.4052
4	0.0638	11.1459	20.1224	32.2368	43.5751	53.7703	65.0744	72.1924	82.0544					87			56.2053	16.8773			54.4234
5	0.0933	12.1244	20.2679	32.4427	45.5314	54.4466	68.1554	77.4545	84.5522					88			56.4406	17.1914			54.6059
6	0.1572	12.4836	20.287	32.7591	45.8164	55.6516								89			57.1495	17.2223			54.8123
7	0.2317	12.585	20.6041	33.3525	46.1672	56.3196								90			57.2973	17.4722			55.2031
8	0.3211	13.3136	21.1061	34.6214	46.5505	58.6853								91			58.0135	17.5752			55.5342
9	0.6465	13.4533	21.2371	35.4229	48.0923									92			58.6865	17.7614			56.1136
10	0.8498	13.4928	22.2188	35.6897	49.4339									93			58.687	17.8131			56.3202
11	0.8631	13.8393	22.568	35.7526	49.6576									94			59.1972	17.8235			56.5752
12	0.9434	13.9235	24.3584	35.8567	49.9723									95			59.3406	17.8593			56.6943
13	1.2429	14.1295	24.9849	36.2428										96			59.7538	17.9926			56.9962
14	1.6255	15.0253	25.4489	36.4027										97			60.2855	18.1035			57.9816
15	2.0963	15.0366	25.522	36.7769										98			60.5846	18.4226			58.0566
16	2.3555	15.2398	25.7944	38.545										99			60.678	18.536			58.0866
17	2.5949	15.9061	25.8923											100			60.9018	18.6527			59.2244
18	2.7472	16.5836	25.9061											101			60.9743	18.9589			59.5364
19	3.2812	18.5282	25.9349											102			61.3712	18.9678			60.2018
20	3.6326	18.613	26.1722											103			61.5737	19.0584			60.413
21	4.3969		26.2784											104			61.6568	19.4			60.5227
22	4.998		26.3965											105			61.6883	19.4021			60.5846
23	5.4729													106			64.5015	19.5078			60.7375
24	5.7933													107			64.5969	19.5123			60.7465
25	6.0359													108			64.6664	19.5953			61.0041
26	6.1325													109			65.0163	19.5962			61.2959
27	6.73													110			65.2417	19.7554			62.5252
28	7.0675													111			65.8616	19.8614			62.5922
29	7.2826													112			65.8681	20.0119			62.7953
30	8.9778													113			66.0714	20.0402			62.8727
31	9.2293													114			66.3258	20.249			63.2003
32	9.6937													115			66.4489	20.6041			63.2532
														116			66.5015	20.6676			63.5512
														117			67.0407	20.9025			63.576
														118			67.1921	21.1061			63.9084
														119			67.6325	21.7293			63.9315
														120			67.8727	21.8194			63.9681
														121			68.0336	21.9861			64.0358
														122			68.4043	22.1987			64.3121
														123			68.5529	22.8399			64.7544
														124			68.8137	23.0553			65.0981
														125			69.1322	23.9562			65.2071
														126			69.2593	24.2248			65.7136
														127			69.4335	25.5962			65.9238
														128			69.5515	25.7944			65.9504
														129			70.1831	26.1293			66.019
														130			70.2703	26.1722			66.2896
														131			70.2876	26.4063			66.5048
														132			70.5939	26.9274			66.5493
														133			70.6431	27.0799			66.9293
														134			70.6681	28.1325			66.9519
														135			70.8019	28.3607			67.2183
														136			71.1488	28.5795			67.5656
														137			71.2507	28.9424			67.7739
														138			71.5701	29.2057			67.9036
														139			71.5866	29.3749			67.979
														140			71.8625	29.6223			68.0119
														141			72.0349	30.0878			68.048
														142			72.0808	30.1182			68.4168
														143			72.3334	30.3851			68.5929
														144			72.6732	31.1728			68.6502
														145			73.2572	31.4529			68.6954
														146			73.4248	31.7412			69.0264
														147			73.5608	32.1364			69.1039
														148			73.7899	32.263			69.1239
														149			74.0685	32.4629			69.5656
														150			74.2641	32.7256			69.6778
														151			74.769	32.7591			69.7758
														152			74.968	32.83			70.0188
														153			75.1494	33.3691			70.1133
														154			75.5795	34.107			70.1393
														155			75.9073	34.5123			70.5528
														156			76.1348	34.5199			70.9715
														157			76.8709	34.8481			71.1213
														158			76.959	35.0673			71.1795
														159			77.0925	35.4852			71.2265
														160			77.1987	35.7526			71.2418
														161			77.616	35.8089			71.6312
														162			77.6432	35.9999			71.6449
														163			77.9743	37.1569			71.7615
														164			78.1097	38.5766			71.9962
														165			78.469	39.5565			72.2485
														166			79.315	39.7645			72.3444
														167			79.4527	40.3848			72.6549
														168			79.5681	40.9748			72.7694
														169			80.1149	41.2364			72.8533
														170			80.1905	41.6381			72.8785
														171			80.5348	42.4865			73.3167
														172			80.7807	42.7581			73.4091
														173			80.7936	43.3186			73.6091
														174			81.2338	43.4144			73.7356
														175			81.3983	43.7983			73.8893
														176			81.564	43.9382			74.0541
														177			81.7163	44.2799			74.3124
														178			82.1448	44.4218			74.3338
														179			82.3845	44.4617			74.7102
														180			82.4374	44.5235			75.0352
														181			82.4905	44.7291			75.3093
														182			82.6167	45.6745			75.3307
														183			82.6585	45.7753			75.538
														184			82.7275	45.8164			75.7773
														185			82.7694	46.4884			75.9913
														186			82.997	47.414			76.2432
														187			82.9993	48.0923			76.2451
														188			83.1608	48.2318			76.4746
														189			83.2668	48.3755			76.4783
														190			83.2956	48.3812			76.507
														191			83.6783	48.5802			76.5163
														192			83.867	48.6213			77.1568
														193			84.3676	48.7032			77.2922
														194			84.6906	49.2936			77.412
														195			84.7638	49.3492			78.1964
														196			85.1813	49.4339			78.3025
														197			85.6665	49.6576			78.3328
														198			86.0498	49.9723			78.334
														199			86.072	50.4009			78.5691
														200			86.1586	50.6483			78.7035
														201			86.1852	51.0334			78.934
														202			86.2126	51.1281			79.297
														203			86.302	51.1634			79.3188
														204			86.729	51.8767			79.4582
														205			86.824	51.8926			79.5347
														206			87.0003	51.9837			79.5762
														207			87.0329	52.0843			79.9173
														208			87.1067	52.1376			80.0085
														209			87.4624	52.569			80.0109
														210			87.5959	52.7032			80.0322
														211			87.7304	54.7504			80.4034
														212			87.7719	54.9688			80.4494
														213			88.2155	55.2531			80.5161
														214			88.2774	55.524			80.5535
														215			88.3642	55.6362			80.6198
														216			88.4483	56.0192			80.6467
														217			88.4925	56.936			80.8586
														218			88.7913	57.0343			81.0441
														219			88.9186	57.1338			81.4704
														220			89.0448	57.5447			81.5991
														221			89.053	57.5591			81.5991
														222			89.1645	57.7141			81.6207
														223			89.2952	57.8959			81.7283
														224			89.4187	58.01			82.0319
														225			89.6413	58.0114			82.2096
														226			89.7412	58.0539			82.3138
														227			89.8986	58.4466			82.3918
														228				58.6853			82.4905
														229				59.0593			82.5681
														230				59.1982			82.6313
														231				59.4424			82.6548
														232				59.4759			82.7565
														233				59.7158			82.7583
														234				59.7708			82.9084
														235				60.439			82.9977
														236				60.5835			82.9993
														237				60.5984			83.0595
														238				60.7548			83.1608
														239				61.1241			83.2349
														240				61.3865			83.2674
														241				61.7402			83.4151
														242				62.4231			83.672
														243				62.4295			83.9071
														244				62.5919			84.0743
														245				62.6889			84.155
														246				62.8371			84.1899
														247				64.0833			84.5818
														248				64.5565			84.6088
														249				65.8458			84.6406
														250				66.1301			84.8424
														251				66.203			84.9037
														252				66.2579			84.9092
														253				66.5721			85.2665
														254				67.4371			85.3073
														255				67.7364			85.3291
														256				67.7699			85.3328
														257				67.8184			85.5428
														258				67.898			85.6472
														259				68.2086			85.7437
														260				68.7854			86.0136
														261				68.9445			86.1202
														262				69.3038			86.1515
														263				69.6689			86.155
														264				69.9643			86.1586
														265				70.5214			86.2239
														266				70.9861			86.284
														267				71.1418			86.3676
														268				71.5328			86.6001
														269				71.6543			86.6072
														270				72.0035			86.685
														271				72.5966			86.9562
														272				72.8744			87.0194
														273				73.4945			87.0917
														274				73.5154			87.1075
														275				73.6			87.1434
														276				73.6752			87.1551
														277				73.6916			87.1856
														278				73.8222			87.2411
														279				73.8963			87.2545
														280				74.0228			87.4911
														281				74.4359			87.5219
														282				74.7491			87.5959
														283				75.0784			87.6394
														284				75.1348			87.7118
														285				75.6646			87.7304
														286				75.8416			88.0064
														287				76.0803			88.3027
														288				76.5088			88.6161
														289				76.5819			88.7473
														290				76.7671			88.9186
														291				76.8244			89.0813
														292				77.0889			89.0946
														293				77.6745			89.1098
														294				78.1328			89.1126
														295				78.2555			89.1721
														296				78.3509			89.2103
														297				78.4879			89.2135
														298				78.4927			89.2934
														299				78.5054			89.2952
														300				79.0116			89.2984
														301				79.2888			89.3193
														302				79.4867			89.3225
														303				79.6353			89.3439
														304				79.6957			89.3582
														305				79.7887			89.3991
														306				80.3519			89.4184
														307				80.9346			89.5951
														308				81.4432
														309				81.4566
														310				81.5933
														311				81.6223
														312				81.6413
														313				82.0458
														314				82.3237
														315				82.4453
														316				82.4552
														317				82.7175
														318				82.8791
														319				83.0191
														320				83.1606
														321				83.3427
														322				83.3746
														323				83.5192
														324				83.9314
														325				83.9341
														326				83.947
														327				84.2044
														328				84.4485
														329				84.4672
														330				84.5237
														331				84.6802
														332				84.9937
														333				85.0618
														334				85.1469
														335				85.2095
														336				85.3311
														337				85.4974
														338				85.9193
														339				86.1234
														340				86.1365
														341				86.2638
														342				86.4227
														343				86.4299
														344				86.9982
														345				87.1482
														346				87.2139
														347				87.3502
														348				87.7099
														349				87.8566
														350				87.911
														351				87.9751
														352				88.2421
														353				88.3213
														354				88.8419
														355				88.9061
														356				89.0592
														357				89.0693
														358				89.1217
														359				89.2983
														360				89.3619
