# Supplementary material for: Plasticity-induced actin polymerization in the dendritic shaft regulates intracellular AMPA receptor trafficking
Source: eLife. 2024 Aug 15;13:e80622. doi: 10.7554/eLife.80622 (PMC11326776; doi:10.7554/eLife.80622)
Supplement: Figure 6—source data 1. [file elife-80622-fig6-data1.xlsx]

## Sheet: Figure 6
Figure 6-source data 2 - related to Figure 6B (bottom) - Fraction of GluA1-HT-SEP vesicles exhibiting active transport										Figure 6-source data 1 - related to Figure 6B (top) - Radius of confinement for GluA1-HT-SEP vesicles									Figure 6-source data 3 - related to Figure 6D - Directional biase (theta) of pre-exocytosis GluA1-HT-SEP vesicles
	Pre-exocytosis			Non-exocytosis						Trajectory	Pre-exocytosis	Non-exocytosis							Trajectory	No MNI	sLTP	sLTP+LatA	sLTP+MI
	Average	Std Dev	Experiments	Average	Std Dev	Experiments				1	0.0103	0.0113							1	0.0615	0.0126	2.2535	0.726
No MNI	0.1	0.18	12	0.38	0.13	12				2	0.0111	0.0128							2	0.6182	0.0638	13.8745	3.6436
sLTP	0.46	0.26	12	0.09	0.11	12				3	0.0155	0.019							3	4.6344	0.1572	15.0833	12.6092
SLTP+LatA	0.08	0.12	9	0.29	0.14	9				4	0.0195	0.0271							4	6.3303	0.2317	20.6754	17.4607
sLTP+MI	0.08	0.18	9	0.1	0.13	9				5	0.0202	0.0316							5	14.9831	0.6465	21.2948	20.0724
										6	0.0268	0.0329							6	15.2672	0.8631	25.5826	20.6273
										7	0.0305	0.036							7	18.1767	1.2429	26.6839	23.627
										8	0.0312	0.0461							8	20.4722	2.3555	30.492	29.9231
										9	0.0341	0.0462							9	21.15	4.3969	32.9739	30.5418
										10	0.036	0.0493							10	26.8003	5.7933	38.2232	32.1395
										11	0.0454	0.0533							11	27.2802	6.0359	39.5314	32.7903
										12	0.0459	0.0573							12	29.3903	7.2826	41.2313	36.5509
										13	0.0466	0.0612							13	31.766	9.6937	41.3757	43.6606
										14	0.0482	0.0694							14	33.4718	10.2679	44.3914	46.544
										15	0.0521	0.0704							15	37.2378	11.1459	44.7072	47.4854
										16	0.056	0.0714							16	38.4098	12.1244	46.4401	47.7461
										17	0.0582	0.0719							17	38.9086	13.3136	52.7742	49.5426
										18	0.0598	0.072							18	44.6348	14.1295	52.8192	51.7307
										19	0.0621	0.0727							19	45.3401	15.0366	54.9756	52.3896
										20	0.065	0.0752							20	46.6782	15.9061	57.9099	56.9593
										21	0.0678	0.0758							21	48.7592	16.5836	59.2709	57.122
										22	0.0688	0.0758							22	51.8663	20.2679	62.5541	58.2257
										23	0.071	0.0771							23	51.9556	20.287	64.1166	62.4488
										24	0.0737	0.0795							24	56.4241	21.2371	66.4566	63.4817
										25	0.0779	0.0804							25	56.5672	22.2188	68.9436	66.1223
										26	0.0787	0.0807							26	64.2544	24.3584	71.2679	68.4523
										27	0.0898	0.0878							27	65.5232	24.9849	74.531	71.4431
										28	0.0923	0.0917							28	66.8909	25.9061	78.9987	72.5218
										29	0.0946	0.0942							29	68.8819	25.9349	79.4989	74.1253
										30	0.0955	0.0966							30	70.9193	26.3965	80.5439	82.0183
										31	0.0964	0.0975							31	72.1031	30.287	84.0419	82.3054
										32	0.103	0.0984							32	75.3813	31.2371
										33	0.1076	0.1032							33	75.3921	33.3525
										34	0.1175	0.1052							34	77.0548	34.6214
										35	0.14	0.1058							35	77.1289	36.7769
										36	0.1438	0.1086							36	82.0085	38.545
										37	0.1439	0.1186							37	88.2334	42.2446
										38	0.1515	0.1262							38	89.9743	43.5751
										39	0.1516	0.1284							39		45.5314
										40	0.1526	0.1358							40		46.1672
										41	0.1647	0.1413							41		46.5505
										42	0.2094	0.143							42		51.1572
										43	0.2182	0.1453							43		53.7703
										44	0.2249	0.1464							44		54.4466
										45	0.2267	0.1467							45		56.3196
										46	0.2321	0.154							46		62.8986
										47	0.2631	0.1662							47		71.0335
										48	0.3254	0.1709							48		77.4545
										49	0.3748	0.1716							49		80.5498
										50	0.3859	0.2065							50		80.5689
										51	0.4513	0.2081
										52	0.5162	0.2113
										53	0.5802	0.22
										54	0.6966	0.2202
										55	0.8169	0.2269
										56	0.8986	0.2288
										57	0.9026	0.235
										58	1.0921	0.2621
										59	1.3932	0.2655
										60	1.4641	0.2687
										61	1.4679	0.2931
										62	2.1841	0.3042
										63	2.2892	0.3283
										64	2.5624	0.3295
										65	4.1607	0.3438
										66		0.345
										67		0.3466
										68		0.3782
										69		0.3894
										70		0.3906
										71		0.3953
										72		0.4009
										73		0.4188
										74		0.4364
										75		0.4498
										76		0.4554
										77		0.461
										78		0.5209
										79		0.5241
										80		0.5262
										81		0.5855
										82		0.6119
										83		0.6327
										84		0.6404
										85		0.6507
										86		0.6875
										87		0.69
										88		0.6931
										89		0.703
										90		0.7115
										91		0.7321
										92		0.7496
										93		0.7718
										94		0.774
										95		0.8243
										96		0.8343
										97		0.8506
										98		0.9026
										99		0.9068
										100		0.9178
										101		0.98
										102		0.9918
										103		1.0324
										104		1.102
										105		1.1603
										106		1.254
										107		1.3058
										108		1.3932
										109		1.4641
										110		1.4813
										111		1.4896
										112		1.4993
										113		1.6278
										114		1.7012
										115		1.7621
										116		1.7972
										117		1.881
										118		1.9422
										119		2.0482
										120		2.1841
										121		2.239
										122		2.2662
										123		2.3101
										124		2.3382
										125		2.6116
										126		2.8051
										127		2.8865
										128		2.9358
										129		2.9365
										130		2.9792
										131		3.2237
										132		4.1987
										133		4.2497
										134		4.4376
										135		4.5755
										136		4.5785
										137		4.9885
										138		4.9953
										139		5.0559
										140		5.3665
										141		5.6101
										142		8.3974
										143		8.4993
										144		9.1597
										145		9.9906
										146		10.1118
										147		10.7329
										148		11.2203
										149		16.6429
										150		2.8865
										151		8.3215
										152		6.6101
										153		7.9002
										154		2.2313
										155		3.3212
										156		1.9284
										157		4.1142
										158		3.5876
										159		1.9212
										160		4.9405
										161		1.0713
										162		1.3511
										163		1.1372
										164		2.2696
										165		6.3193
										166		6.3768
										167		4.8572
										168		3.9053
										169		2.1486
										170		1.5612
										171		5.8389
										172		0.005
										173		0.0215
										174		0.0288
										175		0.0683
										176		0.0977
